# Supplementary material
Source: publisher site journal article supplement (https://www.spandidos-publications.com/1900/downloadSupplementary)
Supplement: Supplementary file 1 [file downloadSupplementary]

## Sheet: Sheet1
Table SI. Differential methylation region associated with long non-coding RNAs.
Chr	Start	End	GeneName	Methylation Status	Methylation Difference	Meancase	Meancontrol
chr1	63318290	63318744	LINC00466	hypermethylation	0.41	0.51	0.11
chr1	63318917	63318946	LINC00466	hypermethylation	0.33	0.61	0.28
chr1	63319127	63319180	LINC00466	hypermethylation	0.33	0.48	0.15
chr1	63319351	63319588	LINC00466	hypermethylation	0.47	0.59	0.12
chr1	63319610	63319867	LINC00466	hypermethylation	0.52	0.58	0.07
chr1	63319870	63319885	LINC00466	hypermethylation	0.48	0.55	0.07
chr1	63319911	63319951	LINC00466	hypermethylation	0.5	0.53	0.03
chr1	63320012	63320030	LINC00466	hypermethylation	0.38	0.55	0.17
chr1	63320035	63320089	LINC00466	hypermethylation	0.44	0.52	0.08
chr1	63320149	63320200	LINC00466	hypermethylation	0.45	0.48	0.03
chr1	63320246	63320525	LINC00466	hypermethylation	0.52	0.52	0
chr1	63320748	63320980	LINC00466	hypermethylation	0.44	0.55	0.11
chr1	63321278	63321310	LINC00466	hypermethylation	0.4	0.4	0
chr1	63321418	63321481	LINC00466	hypermethylation	0.41	0.57	0.15
chr1	63321542	63321680	LINC00466	hypermethylation	0.38	0.43	0.05
chr1	63326062	63326228	LINC00466	hypermethylation	0.44	0.54	0.1
chr1	187631398	187631491	ERVMER61-1	hypomethylation	-0.62	0.31	0.93
chr1	187631763	187632265	ERVMER61-1	hypomethylation	-0.34	0.45	0.79
chr1	187640082	187640172	ERVMER61-1	hypomethylation	-0.32	0.38	0.69
chr1	187648971	187650343	ERVMER61-1	hypomethylation	-0.33	0.43	0.76
chr1	187641650	187642323	ERVMER61-1	hypomethylation	-0.48	0.46	0.94
chr1	6235050	6235280	LINC00337	hypomethylation	-0.37	0.15	0.52
chr1	6236692	6236746	LINC00337	hypomethylation	-0.44	0.34	0.77
chr1	63227374	63228002	LINC00466	hypomethylation	-0.37	0.57	0.95
chr1	98040762	98041663	MIR137HG	hypomethylation	-0.44	0.42	0.86
chr1	98055693	98055897	MIR137HG	hypomethylation	-0.4	0.52	0.91
chr1	98040762	98041663	MIR137HG	hypomethylation	-0.44	0.42	0.86
chr1	98042506	98043050	MIR137HG	hypomethylation	-0.43	0.27	0.7
chr1	98055693	98055897	MIR137HG	hypomethylation	-0.4	0.52	0.91
chr1	98040762	98041663	MIR137HG	hypomethylation	-0.44	0.42	0.86
chr1	98042506	98043050	MIR137HG	hypomethylation	-0.43	0.27	0.7
chr1	187631616	187632265	ERVMER61-1	hypomethylation	-0.34	0.45	0.79
chr1	187640082	187640172	ERVMER61-1	hypomethylation	-0.32	0.38	0.69
chr1	187641304	187641418	ERVMER61-1	hypomethylation	-0.3	0.59	0.89
chr1	187648971	187650343	ERVMER61-1	hypomethylation	-0.33	0.43	0.76
chr1	187641650	187642323	ERVMER61-1	hypomethylation	-0.48	0.46	0.94
chr1	178537085	178537198	C1orf220	hypomethylation	-0.35	0.45	0.8
chr1	98055693	98055897	MIR137HG	hypomethylation	-0.4	0.52	0.91
chr1	97981806	97982565	MIR137HG	hypomethylation	-0.4	0.45	0.85
chr1	97983555	97983690	MIR137HG	hypomethylation	-0.37	0.63	1
chr1	97985499	97986039	MIR137HG	hypomethylation	-0.4	0.6	1
chr1	97991830	97992305	MIR137HG	hypomethylation	-0.42	0.32	0.75
chr1	97995001	97995653	MIR137HG	hypomethylation	-0.38	0.58	0.96
chr1	98011886	98012196	MIR137HG	hypomethylation	-0.35	0.63	0.98
chr1	98012252	98012542	MIR137HG	hypomethylation	-0.43	0.46	0.88
chr1	98016668	98018449	MIR137HG	hypomethylation	-0.45	0.49	0.94
chr1	98018853	98019264	MIR137HG	hypomethylation	-0.59	0.41	1
chr1	98020233	98020294	MIR137HG	hypomethylation	-0.47	0.53	1
chr1	98021586	98022370	MIR137HG	hypomethylation	-0.37	0.47	0.84
chr1	98026305	98026926	MIR137HG	hypomethylation	-0.35	0.52	0.86
chr1	98029033	98029277	MIR137HG	hypomethylation	-0.35	0.54	0.89
chr1	98030748	98031275	MIR137HG	hypomethylation	-0.38	0.49	0.87
chr1	98040762	98041663	MIR137HG	hypomethylation	-0.44	0.42	0.86
chr1	98042506	98043050	MIR137HG	hypomethylation	-0.43	0.27	0.7
chr1	63318290	63318744	LINC00466	hypermethylation	0.41	0.51	0.11
chr1	63318917	63318946	LINC00466	hypermethylation	0.33	0.61	0.28
chr1	63319127	63319180	LINC00466	hypermethylation	0.33	0.48	0.15
chr1	63319351	63319588	LINC00466	hypermethylation	0.47	0.59	0.12
chr1	63319610	63319867	LINC00466	hypermethylation	0.52	0.58	0.07
chr1	63319870	63319885	LINC00466	hypermethylation	0.48	0.55	0.07
chr1	63319911	63319951	LINC00466	hypermethylation	0.5	0.53	0.03
chr1	63320012	63320030	LINC00466	hypermethylation	0.38	0.55	0.17
chr1	63320035	63320089	LINC00466	hypermethylation	0.44	0.52	0.08
chr1	63320149	63320200	LINC00466	hypermethylation	0.45	0.48	0.03
chr1	63320246	63320525	LINC00466	hypermethylation	0.52	0.52	0
chr1	63320748	63320980	LINC00466	hypermethylation	0.44	0.55	0.11
chr1	63321278	63321310	LINC00466	hypermethylation	0.4	0.4	0
chr1	63321418	63321481	LINC00466	hypermethylation	0.41	0.57	0.15
chr1	63321542	63321680	LINC00466	hypermethylation	0.38	0.43	0.05
chr1	63184064	63184397	LINC00466	hypomethylation	-0.37	0.47	0.84
chr1	63201692	63203073	LINC00466	hypomethylation	-0.4	0.46	0.87
chr1	63210405	63211039	LINC00466	hypomethylation	-0.37	0.46	0.83
chr1	63227374	63228002	LINC00466	hypomethylation	-0.37	0.57	0.95
chr1	178537085	178537198	C1orf220	hypomethylation	-0.35	0.45	0.8
chr1	6235050	6235280	LINC00337	hypomethylation	-0.37	0.15	0.52
chr1	6236692	6236746	LINC00337	hypomethylation	-0.44	0.34	0.77
chr11	2131068	2131093	IGF2-AS	hypomethylation	-0.34	0.6	0.94
chr11	2131891	2131987	IGF2-AS	hypomethylation	-0.35	0.62	0.96
chr11	2132095	2132185	IGF2-AS	hypomethylation	-0.4	0.42	0.82
chr11	2132451	2132766	IGF2-AS	hypomethylation	-0.48	0.19	0.68
chr11	2135243	2135444	IGF2-AS	hypomethylation	-0.38	0.62	1
chr11	2136705	2136890	IGF2-AS	hypomethylation	-0.37	0.29	0.66
chr11	2148932	2149070	IGF2-AS	hypomethylation	-0.51	0.22	0.73
chr11	2156177	2156498	IGF2-AS	hypomethylation	-0.43	0.34	0.76
chr11	2147374	2147421	IGF2-AS	hypermethylation	0.41	0.59	0.18
chr11	1101320	1101424	MUC2	hypomethylation	-0.35	0.51	0.86
chr11	1103457	1103631	MUC2	hypomethylation	-0.37	0.5	0.88
chr11	1103684	1103930	MUC2	hypomethylation	-0.36	0.64	1
chr11	1103943	1104290	MUC2	hypomethylation	-0.42	0.52	0.94
chr11	70062835	70063102	ANO1-AS2	hypomethylation	-0.42	0.4	0.82
chr11	70073433	70073480	ANO1-AS2	hypermethylation	0.37	0.48	0.11
chr11	70073979	70074011	ANO1-AS2	hypermethylation	0.34	0.66	0.32
chr11	88506433	88506674	GRM5-AS1	hypomethylation	-0.41	0.48	0.9
chr11	1067990	1068093	MUC2	hypomethylation	-0.35	0.41	0.77
chr11	1114696	1114744	MUC2	hypomethylation	-0.41	0.31	0.72
chr11	1120132	1120511	MUC2	hypomethylation	-0.42	0.53	0.96
chr11	1101320	1101446	MUC2	hypomethylation	-0.35	0.51	0.86
chr11	1103781	1103930	MUC2	hypomethylation	-0.36	0.64	1
chr11	1103458	1103780	MUC2	hypomethylation	-0.37	0.5	0.88
chr11	2131068	2131093	IGF2-AS	hypomethylation	-0.34	0.6	0.94
chr11	2131891	2131987	IGF2-AS	hypomethylation	-0.35	0.62	0.96
chr11	2132095	2132185	IGF2-AS	hypomethylation	-0.4	0.42	0.82
chr11	2132451	2132766	IGF2-AS	hypomethylation	-0.48	0.19	0.68
chr11	2135243	2135444	IGF2-AS	hypomethylation	-0.38	0.62	1
chr11	2136705	2136890	IGF2-AS	hypomethylation	-0.37	0.29	0.66
chr11	2148932	2149070	IGF2-AS	hypomethylation	-0.51	0.22	0.73
chr11	2156177	2156498	IGF2-AS	hypomethylation	-0.43	0.34	0.76
chr11	2147374	2147421	IGF2-AS	hypermethylation	0.41	0.59	0.18
chr11	130698289	130698364	C11orf44	hypomethylation	-0.36	0.41	0.77
chr11	2131068	2131093	IGF2-AS	hypomethylation	-0.34	0.6	0.94
chr11	2131891	2131987	IGF2-AS	hypomethylation	-0.35	0.62	0.96
chr11	2132095	2132185	IGF2-AS	hypomethylation	-0.4	0.42	0.82
chr11	2132451	2132766	IGF2-AS	hypomethylation	-0.48	0.19	0.68
chr11	2135243	2135444	IGF2-AS	hypomethylation	-0.38	0.62	1
chr11	2136705	2136890	IGF2-AS	hypomethylation	-0.37	0.29	0.66
chr11	2148932	2149070	IGF2-AS	hypomethylation	-0.51	0.22	0.73
chr11	2156177	2156498	IGF2-AS	hypomethylation	-0.43	0.34	0.76
chr11	2147174	2147310	IGF2-AS	hypomethylation	-0.33	0.57	0.9
chr11	2147374	2147421	IGF2-AS	hypermethylation	0.41	0.59	0.18
chr11	70062835	70063102	ANO1-AS2	hypomethylation	-0.42	0.4	0.82
chr11	70073433	70073480	ANO1-AS2	hypermethylation	0.37	0.48	0.11
chr11	70073979	70074011	ANO1-AS2	hypermethylation	0.34	0.66	0.32
chr11	88506433	88506674	GRM5-AS1	hypomethylation	-0.41	0.48	0.9
chr11	130698289	130698364	C11orf44	hypomethylation	-0.36	0.41	0.77
chr11	1101320	1101424	MUC2	hypomethylation	-0.35	0.51	0.86
chr11	1103446	1103631	MUC2	hypomethylation	-0.37	0.5	0.88
chr11	1103684	1103930	MUC2	hypomethylation	-0.36	0.64	1
chr11	1103943	1104290	MUC2	hypomethylation	-0.42	0.52	0.94
chr12	120965711	120966014	HNF1A-AS1	hypomethylation	-0.4	0.29	0.69
chr12	120940115	120940418	HNF1A-AS1	hypomethylation	-0.41	0.32	0.73
chr12	120940426	120940463	HNF1A-AS1	hypomethylation	-0.38	0.37	0.76
chr12	120940517	120940739	HNF1A-AS1	hypomethylation	-0.47	0.45	0.92
chr12	120944924	120945141	HNF1A-AS1	hypomethylation	-0.38	0.37	0.75
chr12	120965711	120966014	HNF1A-AS1	hypomethylation	-0.4	0.29	0.69
chr12	120965711	120966014	HNF1A-AS1	hypomethylation	-0.4	0.29	0.69
chr12	120965711	120966014	HNF1A-AS1	hypomethylation	-0.4	0.29	0.69
chr13	64076522	64076897	LINC00355	hypomethylation	-0.41	0.51	0.92
chr13	63977795	63978337	LINC00355	hypomethylation	-0.49	0.38	0.87
chr13	63989701	63989794	LINC00355	hypomethylation	-0.41	0.44	0.86
chr13	64023179	64023507	LINC00355	hypomethylation	-0.37	0.56	0.93
chr13	64029670	64029975	LINC00355	hypomethylation	-0.46	0.47	0.93
chr13	64074950	64075241	LINC00355	hypomethylation	-0.36	0.6	0.96
chr13	73651280	73651854	LINC00393	hypomethylation	-0.32	0.68	1
chr13	73411226	73411603	LINC00393	hypomethylation	-0.41	0.44	0.86
chr13	73421132	73421443	LINC00393	hypomethylation	-0.34	0.46	0.79
chr13	73438345	73439370	LINC00393	hypomethylation	-0.33	0.6	0.93
chr13	73529932	73530128	LINC00393	hypermethylation	0.38	0.75	0.37
chr13	106373150	106373444	LINC00460	hypermethylation	0.36	0.51	0.15
chr13	106378604	106378861	LINC00460	hypermethylation	0.33	0.9	0.56
chr13	44801006	44801363	LINC00330	hypomethylation	-0.39	0.43	0.82
chr13	44809149	44809408	LINC00330	hypomethylation	-0.37	0.22	0.59
chr13	106373150	106373444	LINC00460	hypermethylation	0.36	0.51	0.15
chr13	106378604	106378861	LINC00460	hypermethylation	0.33	0.9	0.56
chr13	106373150	106373444	LINC00460	hypermethylation	0.36	0.51	0.15
chr13	106378604	106378861	LINC00460	hypermethylation	0.33	0.9	0.56
chr14	95660648	95661083	TCL6	hypermethylation	0.36	0.39	0.04
chr14	95677089	95677666	TCL6	hypomethylation	-0.42	0.52	0.93
chr14	95645668	95645775	TCL6	hypomethylation	-0.53	0.3	0.84
chr14	95660648	95661083	TCL6	hypermethylation	0.36	0.39	0.04
chr14	95660648	95661083	TCL6	hypermethylation	0.36	0.39	0.04
chr14	95686618	95686974	TCL6	hypomethylation	-0.38	0.47	0.85
chr14	95688079	95688311	TCL6	hypomethylation	-0.46	0.42	0.88
chr14	95688825	95689147	TCL6	hypomethylation	-0.37	0.6	0.98
chr14	95689168	95689398	TCL6	hypomethylation	-0.36	0.33	0.69
chr14	95677089	95677666	TCL6	hypomethylation	-0.42	0.52	0.93
chr14	106472966	106473345	LINC00221	hypomethylation	-0.38	0.5	0.88
chr14	106480058	106480134	LINC00221	hypomethylation	-0.4	0.6	1
chr14	106497411	106497618	LINC00221	hypomethylation	-0.31	0.56	0.87
chr14	106498607	106499465	LINC00221	hypomethylation	-0.42	0.37	0.79
chr14	106504324	106504420	LINC00221	hypomethylation	-0.47	0.18	0.65
chr14	106504709	106505448	LINC00221	hypomethylation	-0.45	0.28	0.73
chr14	106494739	106495183	LINC00221	hypomethylation	-0.42	0.45	0.88
chr14	106483738	106483957	LINC00221	hypomethylation	-0.47	0.33	0.8
chr14	106484660	106485395	LINC00221	hypomethylation	-0.48	0.38	0.87
chr14	106489624	106489823	LINC00221	hypomethylation	-0.5	0.22	0.71
chr14	106490586	106491068	LINC00221	hypomethylation	-0.44	0.49	0.92
chr14	106491109	106491433	LINC00221	hypomethylation	-0.54	0.38	0.93
chr14	106491568	106491701	LINC00221	hypomethylation	-0.35	0.55	0.9
chr14	106492087	106492919	LINC00221	hypomethylation	-0.37	0.32	0.69
chr14	26591557	26592109	NOVA1-AS1	hypomethylation	-0.34	0.58	0.92
chr14	26596653	26596711	NOVA1-AS1	hypermethylation	0.49	0.49	0
chr14	26670125	26670251	NOVA1-AS1	hypomethylation	-0.37	0.54	0.91
chr14	26621961	26622598	NOVA1-AS1	hypomethylation	-0.37	0.56	0.93
chr14	26640868	26641540	NOVA1-AS1	hypomethylation	-0.43	0.52	0.95
chr14	26642260	26642532	NOVA1-AS1	hypomethylation	-0.37	0.51	0.89
chr14	26644615	26644906	NOVA1-AS1	hypomethylation	-0.4	0.6	1
chr14	26645602	26645857	NOVA1-AS1	hypomethylation	-0.35	0.58	0.94
chr14	26648908	26649724	NOVA1-AS1	hypomethylation	-0.44	0.36	0.8
chr14	26807157	26807357	NOVA1-AS1	hypomethylation	-0.33	0.67	1
chr14	26812190	26812444	NOVA1-AS1	hypomethylation	-0.43	0.39	0.82
chr14	26640868	26641540	NOVA1-AS1	hypomethylation	-0.43	0.52	0.95
chr14	26642260	26642532	NOVA1-AS1	hypomethylation	-0.37	0.51	0.89
chr14	26644615	26644906	NOVA1-AS1	hypomethylation	-0.4	0.6	1
chr14	26645602	26645857	NOVA1-AS1	hypomethylation	-0.35	0.58	0.94
chr14	26648908	26649724	NOVA1-AS1	hypomethylation	-0.44	0.36	0.8
chr14	26670125	26670251	NOVA1-AS1	hypomethylation	-0.37	0.54	0.91
chr14	26677336	26682066	NOVA1-AS1	hypomethylation	-0.39	0.53	0.92
chr14	26726833	26727651	NOVA1-AS1	hypomethylation	-0.4	0.53	0.93
chr14	26734865	26734910	NOVA1-AS1	hypomethylation	-0.32	0.68	1
chr14	26761677	26761769	NOVA1-AS1	hypomethylation	-0.54	0.39	0.93
chr14	95660648	95661083	TCL6	hypermethylation	0.36	0.39	0.04
chr14	95686618	95687136	TCL6	hypomethylation	-0.38	0.47	0.85
chr14	26726833	26727651	NOVA1-AS1	hypomethylation	-0.4	0.53	0.93
chr14	26734865	26734910	NOVA1-AS1	hypomethylation	-0.32	0.68	1
chr14	26807157	26807357	NOVA1-AS1	hypomethylation	-0.33	0.67	1
chr14	26812190	26812444	NOVA1-AS1	hypomethylation	-0.43	0.39	0.82
chr14	26761677	26761769	NOVA1-AS1	hypomethylation	-0.54	0.39	0.93
chr14	106472966	106473345	LINC00221	hypomethylation	-0.38	0.5	0.88
chr14	106480058	106480134	LINC00221	hypomethylation	-0.4	0.6	1
chr14	106490586	106491068	LINC00221	hypomethylation	-0.44	0.49	0.92
chr14	106491109	106491433	LINC00221	hypomethylation	-0.54	0.38	0.93
chr14	106491568	106491701	LINC00221	hypomethylation	-0.35	0.55	0.9
chr14	106492087	106492919	LINC00221	hypomethylation	-0.37	0.32	0.69
chr14	106494739	106495183	LINC00221	hypomethylation	-0.42	0.45	0.88
chr14	106497411	106497618	LINC00221	hypomethylation	-0.31	0.56	0.87
chr14	106498607	106499465	LINC00221	hypomethylation	-0.42	0.37	0.79
chr14	106483738	106483957	LINC00221	hypomethylation	-0.47	0.33	0.8
chr14	106484660	106485395	LINC00221	hypomethylation	-0.48	0.38	0.87
chr14	106489624	106489823	LINC00221	hypomethylation	-0.5	0.22	0.71
chr14	95645668	95645775	TCL6	hypomethylation	-0.53	0.3	0.84
chr14	95650637	95651177	TCL6	hypomethylation	-0.33	0.54	0.88
chr14	95677089	95677666	TCL6	hypomethylation	-0.42	0.52	0.93
chr14	95660648	95661083	TCL6	hypermethylation	0.36	0.39	0.04
chr14	37892552	37892727	LINC00517	hypomethylation	-0.39	0.61	1
chr14	95660648	95661083	TCL6	hypermethylation	0.36	0.39	0.04
chr14	95686618	95686974	TCL6	hypomethylation	-0.38	0.47	0.85
chr14	95677089	95677666	TCL6	hypomethylation	-0.42	0.52	0.93
chr14	95645668	95645775	TCL6	hypomethylation	-0.53	0.3	0.84
chr14	95650637	95651177	TCL6	hypomethylation	-0.33	0.54	0.88
chr14	95677089	95677666	TCL6	hypomethylation	-0.42	0.52	0.93
chr14	95660648	95661083	TCL6	hypermethylation	0.36	0.39	0.04
chr14	37892552	37892727	LINC00517	hypomethylation	-0.39	0.61	1
chr14	26807157	26807357	NOVA1-AS1	hypomethylation	-0.33	0.67	1
chr14	26812190	26812444	NOVA1-AS1	hypomethylation	-0.43	0.39	0.82
chr14	106472966	106473345	LINC00221	hypomethylation	-0.38	0.5	0.88
chr14	106480058	106480134	LINC00221	hypomethylation	-0.4	0.6	1
chr14	106523716	106523856	LINC00221	hypomethylation	-0.31	0.58	0.89
chr14	106525432	106525729	LINC00221	hypomethylation	-0.49	0.14	0.64
chr14	106504326	106504420	LINC00221	hypomethylation	-0.47	0.18	0.65
chr14	106483738	106483957	LINC00221	hypomethylation	-0.47	0.33	0.8
chr14	106484660	106485395	LINC00221	hypomethylation	-0.48	0.38	0.87
chr14	106488402	106488851	LINC00221	hypomethylation	-0.43	0.29	0.72
chr14	106489624	106489823	LINC00221	hypomethylation	-0.5	0.22	0.71
chr14	106490586	106491068	LINC00221	hypomethylation	-0.44	0.49	0.92
chr14	106491109	106491433	LINC00221	hypomethylation	-0.54	0.38	0.93
chr14	106491568	106491701	LINC00221	hypomethylation	-0.35	0.55	0.9
chr14	106492087	106492919	LINC00221	hypomethylation	-0.37	0.32	0.69
chr14	106494739	106495183	LINC00221	hypomethylation	-0.42	0.45	0.88
chr14	106497411	106497618	LINC00221	hypomethylation	-0.31	0.56	0.87
chr14	106498607	106499465	LINC00221	hypomethylation	-0.42	0.37	0.79
chr14	106505073	106505359	LINC00221	hypomethylation	-0.49	0.31	0.81
chr14	106507247	106507737	LINC00221	hypomethylation	-0.44	0.23	0.67
chr14	106509113	106509988	LINC00221	hypomethylation	-0.42	0.26	0.67
chr14	106511135	106511741	LINC00221	hypomethylation	-0.43	0.26	0.69
chr14	106511853	106511957	LINC00221	hypomethylation	-0.43	0.32	0.75
chr14	106512038	106512146	LINC00221	hypomethylation	-0.48	0.38	0.85
chr14	106513124	106513671	LINC00221	hypomethylation	-0.37	0.37	0.74
chr14	106514772	106515332	LINC00221	hypomethylation	-0.43	0.41	0.83
chr14	106517267	106518095	LINC00221	hypomethylation	-0.37	0.3	0.67
chr14	106519335	106519789	LINC00221	hypomethylation	-0.42	0.38	0.8
chr17	69004860	69004988	ABCA9-AS1	hypomethylation	-0.37	0.56	0.93
chr17	69011003	69011586	ABCA9-AS1	hypomethylation	-0.45	0.48	0.93
chr17	50768768	50768862	LINC00483	hypomethylation	-0.35	0.28	0.63
chr17	69004860	69004988	ABCA9-AS1	hypomethylation	-0.37	0.56	0.93
chr17	69011003	69011982	ABCA9-AS1	hypomethylation	-0.45	0.48	0.93
chr17	50768768	50768862	LINC00483	hypomethylation	-0.35	0.28	0.63
chr17	69004860	69004988	ABCA9-AS1	hypomethylation	-0.37	0.56	0.93
chr17	69011003	69011586	ABCA9-AS1	hypomethylation	-0.45	0.48	0.93
chr17	68935444	68935835	ABCA9-AS1	hypomethylation	-0.38	0.62	1
chr17	68977364	68977557	ABCA9-AS1	hypomethylation	-0.37	0.45	0.82
chr17	68978287	68980605	ABCA9-AS1	hypomethylation	-0.32	0.64	0.97
chr17	68984521	68984905	ABCA9-AS1	hypomethylation	-0.44	0.49	0.94
chr17	69004860	69004988	ABCA9-AS1	hypomethylation	-0.37	0.56	0.93
chr17	69011003	69011982	ABCA9-AS1	hypomethylation	-0.45	0.48	0.93
chr17	69004860	69004988	ABCA9-AS1	hypomethylation	-0.37	0.56	0.93
chr17	69011003	69011586	ABCA9-AS1	hypomethylation	-0.45	0.48	0.93
chr17	69011003	69011586	ABCA9-AS1	hypomethylation	-0.45	0.48	0.93
chr17	50768768	50768862	LINC00483	hypomethylation	-0.35	0.28	0.63
chr17	17675887	17676209	SMCR2	hypomethylation	-0.33	0.29	0.62
chr17	69004860	69004988	ABCA9-AS1	hypomethylation	-0.37	0.56	0.93
chr17	69011003	69011586	ABCA9-AS1	hypomethylation	-0.45	0.48	0.93
chr18	1359701	1360147	LINC00470	hypomethylation	-0.5	0.43	0.93
chr18	1362664	1362837	LINC00470	hypomethylation	-0.33	0.55	0.88
chr18	1365453	1366208	LINC00470	hypomethylation	-0.39	0.35	0.74
chr18	1368269	1368404	LINC00470	hypomethylation	-0.37	0.43	0.79
chr18	1259011	1259849	LINC00470	hypomethylation	-0.4	0.36	0.76
chr18	1269011	1269383	LINC00470	hypomethylation	-0.33	0.67	1
chr18	1281461	1282375	LINC00470	hypomethylation	-0.51	0.44	0.94
chr18	1292746	1293078	LINC00470	hypomethylation	-0.47	0.39	0.87
chr18	1294394	1294619	LINC00470	hypomethylation	-0.42	0.44	0.86
chr18	1296004	1296653	LINC00470	hypomethylation	-0.39	0.42	0.81
chr18	1296732	1296993	LINC00470	hypomethylation	-0.33	0.43	0.76
chr18	1299046	1299294	LINC00470	hypomethylation	-0.51	0.35	0.86
chr18	1299841	1300395	LINC00470	hypomethylation	-0.33	0.34	0.67
chr18	1301408	1301653	LINC00470	hypomethylation	-0.31	0.63	0.94
chr18	1307239	1308360	LINC00470	hypomethylation	-0.36	0.5	0.86
chr18	1314021	1314151	LINC00470	hypomethylation	-0.45	0.42	0.87
chr18	1314280	1314592	LINC00470	hypomethylation	-0.44	0.51	0.95
chr18	1316393	1317053	LINC00470	hypomethylation	-0.41	0.39	0.8
chr18	1317265	1317727	LINC00470	hypomethylation	-0.34	0.53	0.87
chr18	1321702	1322101	LINC00470	hypomethylation	-0.42	0.5	0.93
chr18	1324529	1324690	LINC00470	hypomethylation	-0.4	0.38	0.78
chr18	1335535	1335796	LINC00470	hypomethylation	-0.37	0.56	0.93
chr18	1336617	1336832	LINC00470	hypomethylation	-0.32	0.23	0.55
chr18	1341935	1342873	LINC00470	hypomethylation	-0.33	0.47	0.79
chr18	1345351	1345948	LINC00470	hypomethylation	-0.46	0.31	0.77
chr18	1351616	1352520	LINC00470	hypomethylation	-0.4	0.42	0.82
chr18	1356344	1356458	LINC00470	hypomethylation	-0.44	0.56	1
chr18	1359701	1360147	LINC00470	hypomethylation	-0.5	0.43	0.93
chr18	1362664	1362837	LINC00470	hypomethylation	-0.33	0.55	0.88
chr18	1365453	1366208	LINC00470	hypomethylation	-0.39	0.35	0.74
chr18	1368269	1368404	LINC00470	hypomethylation	-0.37	0.43	0.79
chr18	1269080	1269383	LINC00470	hypomethylation	-0.33	0.67	1
chr18	1281461	1282375	LINC00470	hypomethylation	-0.51	0.44	0.94
chr18	1292746	1293078	LINC00470	hypomethylation	-0.47	0.39	0.87
chr18	1294394	1294619	LINC00470	hypomethylation	-0.42	0.44	0.86
chr18	1296004	1296653	LINC00470	hypomethylation	-0.39	0.42	0.81
chr18	1296732	1296993	LINC00470	hypomethylation	-0.33	0.43	0.76
chr18	1299046	1299294	LINC00470	hypomethylation	-0.51	0.35	0.86
chr18	1299841	1300395	LINC00470	hypomethylation	-0.33	0.34	0.67
chr18	1301408	1301653	LINC00470	hypomethylation	-0.31	0.63	0.94
chr18	1307239	1308360	LINC00470	hypomethylation	-0.36	0.5	0.86
chr18	1314021	1314151	LINC00470	hypomethylation	-0.45	0.42	0.87
chr18	1314280	1314592	LINC00470	hypomethylation	-0.44	0.51	0.95
chr18	1316393	1317053	LINC00470	hypomethylation	-0.41	0.39	0.8
chr18	1317265	1317727	LINC00470	hypomethylation	-0.34	0.53	0.87
chr18	1321702	1322101	LINC00470	hypomethylation	-0.42	0.5	0.93
chr18	1324529	1324690	LINC00470	hypomethylation	-0.4	0.38	0.78
chr18	1335535	1335796	LINC00470	hypomethylation	-0.37	0.56	0.93
chr18	1336617	1336832	LINC00470	hypomethylation	-0.32	0.23	0.55
chr18	1341935	1342873	LINC00470	hypomethylation	-0.33	0.47	0.79
chr18	1345351	1345948	LINC00470	hypomethylation	-0.46	0.31	0.77
chr18	1356344	1356458	LINC00470	hypomethylation	-0.44	0.56	1
chr18	1359701	1360147	LINC00470	hypomethylation	-0.5	0.43	0.93
chr18	1362664	1362837	LINC00470	hypomethylation	-0.33	0.55	0.88
chr18	1365453	1366208	LINC00470	hypomethylation	-0.39	0.35	0.74
chr18	1368269	1368404	LINC00470	hypomethylation	-0.37	0.43	0.79
chr18	1259176	1259849	LINC00470	hypomethylation	-0.43	0.39	0.82
chr18	1269176	1269383	LINC00470	hypomethylation	-0.33	0.67	1
chr18	1281461	1282375	LINC00470	hypomethylation	-0.51	0.44	0.94
chr18	1292746	1293078	LINC00470	hypomethylation	-0.47	0.39	0.87
chr18	1294394	1294619	LINC00470	hypomethylation	-0.42	0.44	0.86
chr18	1296004	1296653	LINC00470	hypomethylation	-0.39	0.42	0.81
chr18	1296732	1296993	LINC00470	hypomethylation	-0.33	0.43	0.76
chr18	1299046	1299294	LINC00470	hypomethylation	-0.51	0.35	0.86
chr18	1299841	1300395	LINC00470	hypomethylation	-0.33	0.34	0.67
chr18	1301408	1301653	LINC00470	hypomethylation	-0.31	0.63	0.94
chr18	1307239	1308360	LINC00470	hypomethylation	-0.36	0.5	0.86
chr18	1314021	1314151	LINC00470	hypomethylation	-0.45	0.42	0.87
chr18	1314280	1314592	LINC00470	hypomethylation	-0.44	0.51	0.95
chr18	1316393	1317053	LINC00470	hypomethylation	-0.41	0.39	0.8
chr18	1317265	1317727	LINC00470	hypomethylation	-0.34	0.53	0.87
chr18	1321702	1322101	LINC00470	hypomethylation	-0.42	0.5	0.93
chr18	1324529	1324690	LINC00470	hypomethylation	-0.4	0.38	0.78
chr18	1335535	1335796	LINC00470	hypomethylation	-0.37	0.56	0.93
chr18	1336617	1336832	LINC00470	hypomethylation	-0.32	0.23	0.55
chr18	1341935	1342873	LINC00470	hypomethylation	-0.33	0.47	0.79
chr18	1345351	1345948	LINC00470	hypomethylation	-0.46	0.31	0.77
chr18	1351616	1352520	LINC00470	hypomethylation	-0.4	0.42	0.82
chr18	1356344	1356458	LINC00470	hypomethylation	-0.44	0.56	1
chr18	1409634	1409860	LINC00470	hypomethylation	-0.4	0.45	0.85
chr18	1410044	1410550	LINC00470	hypomethylation	-0.37	0.54	0.92
chr18	1411594	1411821	LINC00470	hypomethylation	-0.48	0.37	0.84
chr18	1413223	1413429	LINC00470	hypomethylation	-0.38	0.43	0.81
chr18	1413519	1413773	LINC00470	hypomethylation	-0.51	0.4	0.91
chr18	1414467	1414741	LINC00470	hypomethylation	-0.38	0.51	0.89
chr18	1259004	1259849	LINC00470	hypomethylation	-0.4	0.36	0.76
chr18	1269080	1269383	LINC00470	hypomethylation	-0.33	0.67	1
chr18	1281461	1282375	LINC00470	hypomethylation	-0.51	0.44	0.94
chr18	1292746	1293078	LINC00470	hypomethylation	-0.47	0.39	0.87
chr18	1294394	1294619	LINC00470	hypomethylation	-0.42	0.44	0.86
chr18	1296004	1296653	LINC00470	hypomethylation	-0.39	0.42	0.81
chr18	1296732	1296993	LINC00470	hypomethylation	-0.33	0.43	0.76
chr18	1299046	1299294	LINC00470	hypomethylation	-0.51	0.35	0.86
chr18	1299841	1300395	LINC00470	hypomethylation	-0.33	0.34	0.67
chr18	1301408	1301653	LINC00470	hypomethylation	-0.31	0.63	0.94
chr18	1307239	1308360	LINC00470	hypomethylation	-0.36	0.5	0.86
chr18	1314021	1314151	LINC00470	hypomethylation	-0.45	0.42	0.87
chr18	1314280	1314592	LINC00470	hypomethylation	-0.44	0.51	0.95
chr18	1316393	1317053	LINC00470	hypomethylation	-0.41	0.39	0.8
chr18	1317265	1317727	LINC00470	hypomethylation	-0.34	0.53	0.87
chr18	1321702	1322101	LINC00470	hypomethylation	-0.42	0.5	0.93
chr18	1324529	1324690	LINC00470	hypomethylation	-0.4	0.38	0.78
chr18	1335535	1335796	LINC00470	hypomethylation	-0.37	0.56	0.93
chr18	1336617	1336832	LINC00470	hypomethylation	-0.32	0.23	0.55
chr18	1341935	1342873	LINC00470	hypomethylation	-0.33	0.47	0.79
chr18	1345351	1345948	LINC00470	hypomethylation	-0.46	0.31	0.77
chr18	1351616	1352520	LINC00470	hypomethylation	-0.4	0.42	0.82
chr18	1356344	1356458	LINC00470	hypomethylation	-0.44	0.56	1
chr18	1359701	1360147	LINC00470	hypomethylation	-0.5	0.43	0.93
chr18	1362664	1362837	LINC00470	hypomethylation	-0.33	0.55	0.88
chr18	1365453	1366208	LINC00470	hypomethylation	-0.39	0.35	0.74
chr18	1368269	1368484	LINC00470	hypomethylation	-0.37	0.43	0.79
chr18	1375188	1375346	LINC00470	hypomethylation	-0.41	0.55	0.96
chr18	1377549	1378281	LINC00470	hypomethylation	-0.44	0.41	0.86
chr18	1379784	1380177	LINC00470	hypomethylation	-0.39	0.34	0.73
chr18	1380698	1381425	LINC00470	hypomethylation	-0.45	0.46	0.91
chr18	1395129	1395185	LINC00470	hypomethylation	-0.38	0.52	0.9
chr18	1395263	1395482	LINC00470	hypomethylation	-0.49	0.42	0.92
chr18	1401242	1401432	LINC00470	hypomethylation	-0.41	0.46	0.87
chr18	1401749	1402199	LINC00470	hypomethylation	-0.34	0.59	0.92
chr18	1406348	1406427	LINC00470	hypomethylation	-0.34	0.61	0.95
chr18	1359701	1360147	LINC00470	hypomethylation	-0.5	0.43	0.93
chr18	1362664	1362837	LINC00470	hypomethylation	-0.33	0.55	0.88
chr18	1365453	1366208	LINC00470	hypomethylation	-0.39	0.35	0.74
chr18	1368269	1368404	LINC00470	hypomethylation	-0.37	0.43	0.79
chr18	1259004	1259849	LINC00470	hypomethylation	-0.4	0.36	0.76
chr18	1269080	1269383	LINC00470	hypomethylation	-0.33	0.67	1
chr18	1281461	1282375	LINC00470	hypomethylation	-0.51	0.44	0.94
chr18	1292746	1293078	LINC00470	hypomethylation	-0.47	0.39	0.87
chr18	1294394	1294619	LINC00470	hypomethylation	-0.42	0.44	0.86
chr18	1296004	1296653	LINC00470	hypomethylation	-0.39	0.42	0.81
chr18	1296732	1296993	LINC00470	hypomethylation	-0.33	0.43	0.76
chr18	1299046	1299294	LINC00470	hypomethylation	-0.51	0.35	0.86
chr18	1299841	1300395	LINC00470	hypomethylation	-0.33	0.34	0.67
chr18	1301408	1301653	LINC00470	hypomethylation	-0.31	0.63	0.94
chr18	1307239	1308360	LINC00470	hypomethylation	-0.36	0.5	0.86
chr18	1314021	1314151	LINC00470	hypomethylation	-0.45	0.42	0.87
chr18	1314280	1314592	LINC00470	hypomethylation	-0.44	0.51	0.95
chr18	1316393	1317053	LINC00470	hypomethylation	-0.41	0.39	0.8
chr18	1317265	1317727	LINC00470	hypomethylation	-0.34	0.53	0.87
chr18	1321702	1322101	LINC00470	hypomethylation	-0.42	0.5	0.93
chr18	1324529	1324690	LINC00470	hypomethylation	-0.4	0.38	0.78
chr18	1335535	1335796	LINC00470	hypomethylation	-0.37	0.56	0.93
chr18	1336617	1336832	LINC00470	hypomethylation	-0.32	0.23	0.55
chr18	1341935	1342873	LINC00470	hypomethylation	-0.33	0.47	0.79
chr18	1345351	1345948	LINC00470	hypomethylation	-0.46	0.31	0.77
chr18	1351616	1352520	LINC00470	hypomethylation	-0.4	0.42	0.82
chr18	1356344	1356458	LINC00470	hypomethylation	-0.44	0.56	1
chr18	1409634	1409860	LINC00470	hypomethylation	-0.4	0.45	0.85
chr18	1410044	1410550	LINC00470	hypomethylation	-0.37	0.54	0.92
chr18	1411594	1411821	LINC00470	hypomethylation	-0.48	0.37	0.84
chr18	1413223	1413429	LINC00470	hypomethylation	-0.38	0.43	0.81
chr18	1413519	1413773	LINC00470	hypomethylation	-0.51	0.4	0.91
chr18	1414467	1414741	LINC00470	hypomethylation	-0.38	0.51	0.89
chr18	1269080	1269383	LINC00470	hypomethylation	-0.33	0.67	1
chr18	1281461	1282375	LINC00470	hypomethylation	-0.51	0.44	0.94
chr18	1292746	1293078	LINC00470	hypomethylation	-0.47	0.39	0.87
chr18	1294394	1294619	LINC00470	hypomethylation	-0.42	0.44	0.86
chr18	1296004	1296653	LINC00470	hypomethylation	-0.39	0.42	0.81
chr18	1296732	1296993	LINC00470	hypomethylation	-0.33	0.43	0.76
chr18	1299046	1299294	LINC00470	hypomethylation	-0.51	0.35	0.86
chr18	1299841	1300395	LINC00470	hypomethylation	-0.33	0.34	0.67
chr18	1301408	1301653	LINC00470	hypomethylation	-0.31	0.63	0.94
chr18	1307239	1308360	LINC00470	hypomethylation	-0.36	0.5	0.86
chr18	1314021	1314151	LINC00470	hypomethylation	-0.45	0.42	0.87
chr18	1314280	1314592	LINC00470	hypomethylation	-0.44	0.51	0.95
chr18	1316393	1317053	LINC00470	hypomethylation	-0.41	0.39	0.8
chr18	1317265	1317727	LINC00470	hypomethylation	-0.34	0.53	0.87
chr18	1321702	1322101	LINC00470	hypomethylation	-0.42	0.5	0.93
chr18	1324529	1324690	LINC00470	hypomethylation	-0.4	0.38	0.78
chr18	1335535	1335796	LINC00470	hypomethylation	-0.37	0.56	0.93
chr18	1336617	1336832	LINC00470	hypomethylation	-0.32	0.23	0.55
chr18	1341935	1342873	LINC00470	hypomethylation	-0.33	0.47	0.79
chr18	1345351	1345948	LINC00470	hypomethylation	-0.46	0.31	0.77
chr18	1351616	1352520	LINC00470	hypomethylation	-0.4	0.42	0.82
chr18	1356344	1356458	LINC00470	hypomethylation	-0.44	0.56	1
chr18	1359701	1360147	LINC00470	hypomethylation	-0.5	0.43	0.93
chr18	1362664	1362837	LINC00470	hypomethylation	-0.33	0.55	0.88
chr18	1365453	1366208	LINC00470	hypomethylation	-0.39	0.35	0.74
chr18	1368269	1368484	LINC00470	hypomethylation	-0.37	0.43	0.79
chr18	1375188	1375346	LINC00470	hypomethylation	-0.41	0.55	0.96
chr18	1377549	1378281	LINC00470	hypomethylation	-0.44	0.41	0.86
chr18	1379784	1380177	LINC00470	hypomethylation	-0.39	0.34	0.73
chr18	1380698	1381425	LINC00470	hypomethylation	-0.45	0.46	0.91
chr18	1395129	1395185	LINC00470	hypomethylation	-0.38	0.52	0.9
chr18	1395263	1395482	LINC00470	hypomethylation	-0.49	0.42	0.92
chr18	1401242	1401432	LINC00470	hypomethylation	-0.41	0.46	0.87
chr18	1401749	1402199	LINC00470	hypomethylation	-0.34	0.59	0.92
chr18	1406348	1406427	LINC00470	hypomethylation	-0.34	0.61	0.95
chr18	1395129	1395185	LINC00470	hypomethylation	-0.38	0.52	0.9
chr18	1395263	1395482	LINC00470	hypomethylation	-0.49	0.42	0.92
chr18	1401242	1401432	LINC00470	hypomethylation	-0.41	0.46	0.87
chr18	1359701	1360147	LINC00470	hypomethylation	-0.5	0.43	0.93
chr18	1362664	1362837	LINC00470	hypomethylation	-0.33	0.55	0.88
chr18	1365453	1366208	LINC00470	hypomethylation	-0.39	0.35	0.74
chr18	1375188	1375346	LINC00470	hypomethylation	-0.41	0.55	0.96
chr18	1377549	1378281	LINC00470	hypomethylation	-0.44	0.41	0.86
chr18	1379784	1380177	LINC00470	hypomethylation	-0.39	0.34	0.73
chr18	1380698	1381425	LINC00470	hypomethylation	-0.45	0.46	0.91
chr18	1359701	1360147	LINC00470	hypomethylation	-0.5	0.43	0.93
chr18	1362664	1362837	LINC00470	hypomethylation	-0.33	0.55	0.88
chr18	1365453	1366208	LINC00470	hypomethylation	-0.39	0.35	0.74
chr18	1368269	1368404	LINC00470	hypomethylation	-0.37	0.43	0.79
chr18	1269080	1269566	LINC00470	hypomethylation	-0.33	0.67	1
chr18	1281461	1282375	LINC00470	hypomethylation	-0.51	0.44	0.94
chr18	1292746	1293078	LINC00470	hypomethylation	-0.47	0.39	0.87
chr18	1294394	1294619	LINC00470	hypomethylation	-0.42	0.44	0.86
chr18	1296004	1296653	LINC00470	hypomethylation	-0.39	0.42	0.81
chr18	1296732	1296993	LINC00470	hypomethylation	-0.33	0.43	0.76
chr18	1299046	1299294	LINC00470	hypomethylation	-0.51	0.35	0.86
chr18	1299841	1300395	LINC00470	hypomethylation	-0.33	0.34	0.67
chr18	1301408	1301653	LINC00470	hypomethylation	-0.31	0.63	0.94
chr18	1307239	1308360	LINC00470	hypomethylation	-0.36	0.5	0.86
chr18	1314021	1314151	LINC00470	hypomethylation	-0.45	0.42	0.87
chr18	1314280	1314592	LINC00470	hypomethylation	-0.44	0.51	0.95
chr18	1316393	1317053	LINC00470	hypomethylation	-0.41	0.39	0.8
chr18	1317265	1317727	LINC00470	hypomethylation	-0.34	0.53	0.87
chr18	1321702	1322101	LINC00470	hypomethylation	-0.42	0.5	0.93
chr18	1324529	1324690	LINC00470	hypomethylation	-0.4	0.38	0.78
chr18	1335535	1335796	LINC00470	hypomethylation	-0.37	0.56	0.93
chr18	1336617	1336832	LINC00470	hypomethylation	-0.32	0.23	0.55
chr18	1341935	1342873	LINC00470	hypomethylation	-0.33	0.47	0.79
chr18	1345351	1345948	LINC00470	hypomethylation	-0.46	0.31	0.77
chr18	1351616	1352520	LINC00470	hypomethylation	-0.4	0.42	0.82
chr18	1356344	1356458	LINC00470	hypomethylation	-0.44	0.56	1
chr18	1359701	1360147	LINC00470	hypomethylation	-0.5	0.43	0.93
chr18	1362664	1362837	LINC00470	hypomethylation	-0.33	0.55	0.88
chr18	1365453	1366208	LINC00470	hypomethylation	-0.39	0.35	0.74
chr18	1368269	1368404	LINC00470	hypomethylation	-0.37	0.43	0.79
chr18	1269080	1269383	LINC00470	hypomethylation	-0.33	0.67	1
chr18	1281461	1282375	LINC00470	hypomethylation	-0.51	0.44	0.94
chr18	1292746	1293078	LINC00470	hypomethylation	-0.47	0.39	0.87
chr18	1294394	1294619	LINC00470	hypomethylation	-0.42	0.44	0.86
chr18	1296004	1296653	LINC00470	hypomethylation	-0.39	0.42	0.81
chr18	1296732	1296993	LINC00470	hypomethylation	-0.33	0.43	0.76
chr18	1299046	1299294	LINC00470	hypomethylation	-0.51	0.35	0.86
chr18	1299841	1300395	LINC00470	hypomethylation	-0.33	0.34	0.67
chr18	1301408	1301653	LINC00470	hypomethylation	-0.31	0.63	0.94
chr18	1307239	1308360	LINC00470	hypomethylation	-0.36	0.5	0.86
chr18	1314021	1314151	LINC00470	hypomethylation	-0.45	0.42	0.87
chr18	1314280	1314592	LINC00470	hypomethylation	-0.44	0.51	0.95
chr18	1316393	1317053	LINC00470	hypomethylation	-0.41	0.39	0.8
chr18	1317265	1317727	LINC00470	hypomethylation	-0.34	0.53	0.87
chr18	1321702	1322101	LINC00470	hypomethylation	-0.42	0.5	0.93
chr18	1324529	1324690	LINC00470	hypomethylation	-0.4	0.38	0.78
chr18	1335535	1335796	LINC00470	hypomethylation	-0.37	0.56	0.93
chr18	1336617	1336832	LINC00470	hypomethylation	-0.32	0.23	0.55
chr18	1341935	1342873	LINC00470	hypomethylation	-0.33	0.47	0.79
chr18	1345351	1345948	LINC00470	hypomethylation	-0.46	0.31	0.77
chr18	1351616	1352520	LINC00470	hypomethylation	-0.4	0.42	0.82
chr18	1356344	1356458	LINC00470	hypomethylation	-0.44	0.56	1
chr18	1409634	1409860	LINC00470	hypomethylation	-0.4	0.45	0.85
chr18	1410044	1410550	LINC00470	hypomethylation	-0.37	0.54	0.92
chr18	1411594	1411821	LINC00470	hypomethylation	-0.48	0.37	0.84
chr18	1413223	1413429	LINC00470	hypomethylation	-0.38	0.43	0.81
chr18	1413519	1413773	LINC00470	hypomethylation	-0.51	0.4	0.91
chr18	1414467	1414741	LINC00470	hypomethylation	-0.38	0.51	0.89
chr18	1417454	1417760	LINC00470	hypomethylation	-0.47	0.46	0.93
chr18	1359701	1360147	LINC00470	hypomethylation	-0.5	0.43	0.93
chr18	1362664	1362837	LINC00470	hypomethylation	-0.33	0.55	0.88
chr18	1365453	1366208	LINC00470	hypomethylation	-0.39	0.35	0.74
chr18	1368269	1368404	LINC00470	hypomethylation	-0.37	0.43	0.79
chr18	1375188	1375346	LINC00470	hypomethylation	-0.41	0.55	0.96
chr18	1377549	1378281	LINC00470	hypomethylation	-0.44	0.41	0.86
chr18	1379784	1380177	LINC00470	hypomethylation	-0.39	0.34	0.73
chr18	1380698	1381425	LINC00470	hypomethylation	-0.45	0.46	0.91
chr18	1395129	1395185	LINC00470	hypomethylation	-0.38	0.52	0.9
chr18	1395263	1395482	LINC00470	hypomethylation	-0.49	0.42	0.92
chr18	1401242	1401432	LINC00470	hypomethylation	-0.41	0.46	0.87
chr18	1401749	1402199	LINC00470	hypomethylation	-0.34	0.59	0.92
chr18	1406348	1406427	LINC00470	hypomethylation	-0.34	0.61	0.95
chr18	1359701	1360147	LINC00470	hypomethylation	-0.5	0.43	0.93
chr18	1362664	1362837	LINC00470	hypomethylation	-0.33	0.55	0.88
chr18	1365453	1366208	LINC00470	hypomethylation	-0.39	0.35	0.74
chr18	1368269	1368404	LINC00470	hypomethylation	-0.37	0.43	0.79
chr18	1269080	1269383	LINC00470	hypomethylation	-0.33	0.67	1
chr18	1281461	1282375	LINC00470	hypomethylation	-0.51	0.44	0.94
chr18	1292746	1293078	LINC00470	hypomethylation	-0.47	0.39	0.87
chr18	1294394	1294619	LINC00470	hypomethylation	-0.42	0.44	0.86
chr18	1296004	1296653	LINC00470	hypomethylation	-0.39	0.42	0.81
chr18	1296732	1296993	LINC00470	hypomethylation	-0.33	0.43	0.76
chr18	1299046	1299294	LINC00470	hypomethylation	-0.51	0.35	0.86
chr18	1299841	1300395	LINC00470	hypomethylation	-0.33	0.34	0.67
chr18	1301408	1301653	LINC00470	hypomethylation	-0.31	0.63	0.94
chr18	1307239	1308360	LINC00470	hypomethylation	-0.36	0.5	0.86
chr18	1314021	1314151	LINC00470	hypomethylation	-0.45	0.42	0.87
chr18	1314280	1314592	LINC00470	hypomethylation	-0.44	0.51	0.95
chr18	1316393	1317053	LINC00470	hypomethylation	-0.41	0.39	0.8
chr18	1317265	1317727	LINC00470	hypomethylation	-0.34	0.53	0.87
chr18	1321702	1322101	LINC00470	hypomethylation	-0.42	0.5	0.93
chr18	1324529	1324690	LINC00470	hypomethylation	-0.4	0.38	0.78
chr18	1335535	1335796	LINC00470	hypomethylation	-0.37	0.56	0.93
chr18	1336617	1336832	LINC00470	hypomethylation	-0.32	0.23	0.55
chr18	1341935	1342873	LINC00470	hypomethylation	-0.33	0.47	0.79
chr18	1345351	1345948	LINC00470	hypomethylation	-0.46	0.31	0.77
chr18	1351616	1352520	LINC00470	hypomethylation	-0.4	0.42	0.82
chr18	1356344	1356458	LINC00470	hypomethylation	-0.44	0.56	1
chr19	15825080	15825231	UCA1	hypomethylation	-0.39	0.53	0.92
chr19	15843219	15843701	UCA1	hypomethylation	-0.46	0.19	0.64
chr19	15825080	15825231	UCA1	hypomethylation	-0.39	0.53	0.92
chr19	15843219	15843701	UCA1	hypomethylation	-0.46	0.19	0.64
chr2	15914674	15914991	MYCNOS	hypermethylation	0.34	0.52	0.18
chr2	237429578	237429842	AC112721.1	hypomethylation	-0.4	0.21	0.62
chr2	237432415	237432683	AC112721.1	hypomethylation	-0.42	0.27	0.69
chr2	237432901	237432943	AC112721.1	hypomethylation	-0.41	0.23	0.64
chr2	237434552	237434693	AC112721.1	hypermethylation	0.35	0.67	0.32
chr2	237412558	237412700	AC112721.1	hypomethylation	-0.37	0.44	0.81
chr2	237417485	237417622	AC112721.1	hypomethylation	-0.42	0.51	0.93
chr2	10215508	10215685	C2orf48	hypomethylation	-0.39	0.56	0.95
chr2	10215508	10215685	C2orf48	hypomethylation	-0.39	0.56	0.95
chr20	60070044	60070162	C20orf197	hypomethylation	-0.38	0.62	1
chr21	44989233	44989682	LINC00163	hypomethylation	-0.48	0.43	0.92
chr21	34746419	34746532	LINC00160	hypomethylation	-0.44	0.53	0.97
chr21	34719460	34719584	LINC00160	hypomethylation	-0.32	0.68	1
chr21	34728313	34728452	LINC00160	hypomethylation	-0.38	0.45	0.83
chr21	42925626	42925754	ERVH48-1	hypermethylation	0.51	0.7	0.18
chr21	42925647	42925754	ERVH48-1	hypermethylation	0.51	0.7	0.18
chr21	42925647	42925846	ERVH48-1	hypermethylation	0.51	0.7	0.18
chr21	44989233	44989682	LINC00163	hypomethylation	-0.48	0.43	0.92
chr22	17266628	17266733	CECR3	hypermethylation	0.35	0.42	0.07
chr22	17264188	17264285	CECR3	hypermethylation	0.47	0.76	0.29
chr3	114394511	114394804	ZBTB20-AS1	hypomethylation	-0.32	0.56	0.88
chr3	175274226	175275059	NAALADL2-AS2	hypomethylation	-0.46	0.36	0.81
chr3	114394511	114394804	ZBTB20-AS1	hypomethylation	-0.32	0.56	0.88
chr3	4759146	4759300	EGOT	hypomethylation	-0.33	0.67	1
chr3	4740928	4741140	EGOT	hypermethylation	0.36	0.54	0.18
chr3	177284562	177284904	LINC00501	hypomethylation	-0.41	0.24	0.65
chr3	177307587	177307770	LINC00501	hypomethylation	-0.39	0.61	1
chr3	116350024	116350464	LSAMP-AS1	hypomethylation	-0.59	0.2	0.79
chr3	116350634	116350872	LSAMP-AS1	hypomethylation	-0.43	0.46	0.89
chr3	116350904	116351823	LSAMP-AS1	hypomethylation	-0.46	0.32	0.78
chr3	116352118	116353300	LSAMP-AS1	hypomethylation	-0.5	0.32	0.82
chr3	116353363	116353794	LSAMP-AS1	hypomethylation	-0.43	0.46	0.89
chr3	116354014	116356361	LSAMP-AS1	hypomethylation	-0.4	0.49	0.89
chr3	116357070	116357315	LSAMP-AS1	hypomethylation	-0.45	0.41	0.86
chr3	116358286	116359185	LSAMP-AS1	hypomethylation	-0.38	0.53	0.91
chr3	116370091	116370721	LSAMP-AS1	hypomethylation	-0.54	0.29	0.82
chr3	116371696	116374724	LSAMP-AS1	hypomethylation	-0.43	0.4	0.83
chr3	116375322	116375934	LSAMP-AS1	hypomethylation	-0.45	0.29	0.73
chr3	116377007	116377915	LSAMP-AS1	hypomethylation	-0.44	0.37	0.81
chr3	116367617	116367753	LSAMP-AS1	hypomethylation	-0.48	0.34	0.81
chr3	116368812	116369416	LSAMP-AS1	hypomethylation	-0.37	0.45	0.82
chr3	63540215	63540501	SYNPR-AS1	hypomethylation	-0.37	0.47	0.84
chr5	88678314	88678323	LINC00461	hypermethylation	0.33	0.33	0
chr5	88659627	88660070	LINC00461	hypermethylation	0.34	0.41	0.07
chr5	88672441	88672545	LINC00461	hypermethylation	0.36	0.56	0.21
chr5	88689975	88690004	LINC00461	hypermethylation	0.32	0.39	0.07
chr5	88659627	88660070	LINC00461	hypermethylation	0.34	0.41	0.07
chr5	88672441	88672545	LINC00461	hypermethylation	0.36	0.56	0.21
chr5	88678314	88678323	LINC00461	hypermethylation	0.33	0.33	0
chr5	88684178	88684264	LINC00461	hypermethylation	0.37	0.4	0.04
chr5	88684178	88684264	LINC00461	hypermethylation	0.37	0.4	0.04
chr5	88531167	88532707	LINC00461	hypomethylation	-0.45	0.43	0.87
chr5	88533454	88534007	LINC00461	hypomethylation	-0.39	0.43	0.82
chr5	88536109	88536427	LINC00461	hypomethylation	-0.35	0.28	0.63
chr5	88537926	88538139	LINC00461	hypomethylation	-0.44	0.5	0.93
chr5	88544549	88546095	LINC00461	hypomethylation	-0.43	0.36	0.79
chr5	88557694	88557882	LINC00461	hypomethylation	-0.32	0.34	0.66
chr5	88558428	88558627	LINC00461	hypomethylation	-0.33	0.63	0.97
chr5	88559707	88560514	LINC00461	hypomethylation	-0.41	0.46	0.87
chr5	88560924	88561614	LINC00461	hypomethylation	-0.37	0.53	0.9
chr5	88562419	88563086	LINC00461	hypomethylation	-0.41	0.44	0.85
chr5	88566896	88567552	LINC00461	hypomethylation	-0.39	0.39	0.79
chr5	88568674	88569301	LINC00461	hypomethylation	-0.38	0.56	0.93
chr5	88569743	88570367	LINC00461	hypomethylation	-0.4	0.47	0.87
chr5	88571530	88573771	LINC00461	hypomethylation	-0.47	0.39	0.86
chr5	88574216	88575327	LINC00461	hypomethylation	-0.4	0.36	0.76
chr5	88576179	88577090	LINC00461	hypomethylation	-0.42	0.34	0.76
chr5	88580485	88580886	LINC00461	hypomethylation	-0.36	0.34	0.71
chr5	88581610	88581703	LINC00461	hypomethylation	-0.35	0.65	1
chr5	88583302	88584608	LINC00461	hypomethylation	-0.4	0.42	0.82
chr5	88585765	88586244	LINC00461	hypomethylation	-0.34	0.58	0.92
chr5	88586335	88586813	LINC00461	hypomethylation	-0.37	0.5	0.87
chr5	88587077	88587675	LINC00461	hypomethylation	-0.39	0.16	0.56
chr5	88589476	88590860	LINC00461	hypomethylation	-0.48	0.41	0.89
chr5	88591861	88592289	LINC00461	hypomethylation	-0.41	0.24	0.65
chr5	88592944	88593066	LINC00461	hypomethylation	-0.47	0.24	0.71
chr5	88596057	88596885	LINC00461	hypomethylation	-0.38	0.46	0.84
chr5	88601646	88601828	LINC00461	hypomethylation	-0.39	0.4	0.79
chr5	88604035	88604803	LINC00461	hypomethylation	-0.46	0.53	0.98
chr5	88604892	88604946	LINC00461	hypomethylation	-0.36	0.64	1
chr5	88605321	88605883	LINC00461	hypomethylation	-0.42	0.32	0.74
chr5	88606759	88606962	LINC00461	hypomethylation	-0.37	0.58	0.94
chr5	88607292	88607784	LINC00461	hypomethylation	-0.42	0.4	0.82
chr5	88608246	88608383	LINC00461	hypomethylation	-0.39	0.5	0.89
chr5	88608862	88610453	LINC00461	hypomethylation	-0.43	0.42	0.85
chr5	88610785	88611378	LINC00461	hypomethylation	-0.39	0.41	0.8
chr5	88618889	88619616	LINC00461	hypomethylation	-0.47	0.49	0.96
chr5	88622291	88622329	LINC00461	hypomethylation	-0.43	0.48	0.9
chr5	88622947	88623674	LINC00461	hypomethylation	-0.38	0.53	0.91
chr5	88626443	88626985	LINC00461	hypomethylation	-0.44	0.5	0.94
chr5	88628962	88629543	LINC00461	hypomethylation	-0.32	0.5	0.82
chr5	88631969	88632498	LINC00461	hypomethylation	-0.36	0.54	0.9
chr5	88634482	88634816	LINC00461	hypomethylation	-0.4	0.33	0.73
chr5	88635113	88635280	LINC00461	hypomethylation	-0.3	0.53	0.83
chr5	88635282	88636420	LINC00461	hypomethylation	-0.45	0.45	0.91
chr5	88639671	88640750	LINC00461	hypomethylation	-0.4	0.49	0.9
chr5	88645199	88645790	LINC00461	hypomethylation	-0.38	0.54	0.92
chr5	88647603	88647958	LINC00461	hypomethylation	-0.35	0.26	0.61
chr5	88647974	88648639	LINC00461	hypomethylation	-0.34	0.5	0.84
chr5	88649190	88649492	LINC00461	hypomethylation	-0.36	0.53	0.89
chr5	88649897	88650567	LINC00461	hypomethylation	-0.36	0.46	0.82
chr5	88651450	88651645	LINC00461	hypomethylation	-0.48	0.43	0.91
chr5	88652123	88652593	LINC00461	hypomethylation	-0.41	0.29	0.7
chr5	88655296	88655925	LINC00461	hypomethylation	-0.46	0.29	0.75
chr5	88656185	88656326	LINC00461	hypomethylation	-0.37	0.41	0.79
chr5	88659627	88660070	LINC00461	hypermethylation	0.34	0.41	0.07
chr5	88672441	88672545	LINC00461	hypermethylation	0.36	0.56	0.21
chr5	88678314	88678323	LINC00461	hypermethylation	0.33	0.33	0
chr5	88689975	88690004	LINC00461	hypermethylation	0.32	0.39	0.07
chr5	88531167	88532707	LINC00461	hypomethylation	-0.45	0.43	0.87
chr5	88533454	88534007	LINC00461	hypomethylation	-0.39	0.43	0.82
chr5	88536109	88536427	LINC00461	hypomethylation	-0.35	0.28	0.63
chr5	88537926	88538139	LINC00461	hypomethylation	-0.44	0.5	0.93
chr5	88544549	88546095	LINC00461	hypomethylation	-0.43	0.36	0.79
chr5	88557694	88557882	LINC00461	hypomethylation	-0.32	0.34	0.66
chr5	88558428	88558627	LINC00461	hypomethylation	-0.33	0.63	0.97
chr5	88559707	88560514	LINC00461	hypomethylation	-0.41	0.46	0.87
chr5	88560924	88561614	LINC00461	hypomethylation	-0.37	0.53	0.9
chr5	88562419	88563086	LINC00461	hypomethylation	-0.41	0.44	0.85
chr5	88566896	88567552	LINC00461	hypomethylation	-0.39	0.39	0.79
chr5	88568674	88569301	LINC00461	hypomethylation	-0.38	0.56	0.93
chr5	88569743	88570367	LINC00461	hypomethylation	-0.4	0.47	0.87
chr5	88571530	88573771	LINC00461	hypomethylation	-0.47	0.39	0.86
chr5	88574216	88575327	LINC00461	hypomethylation	-0.4	0.36	0.76
chr5	88576179	88577090	LINC00461	hypomethylation	-0.42	0.34	0.76
chr5	88580485	88580886	LINC00461	hypomethylation	-0.36	0.34	0.71
chr5	88581610	88581703	LINC00461	hypomethylation	-0.35	0.65	1
chr5	88583302	88584608	LINC00461	hypomethylation	-0.4	0.42	0.82
chr5	88585765	88586244	LINC00461	hypomethylation	-0.34	0.58	0.92
chr5	88586335	88586813	LINC00461	hypomethylation	-0.37	0.5	0.87
chr5	88587077	88587675	LINC00461	hypomethylation	-0.39	0.16	0.56
chr5	88589476	88590860	LINC00461	hypomethylation	-0.48	0.41	0.89
chr5	88591861	88592289	LINC00461	hypomethylation	-0.41	0.24	0.65
chr5	88592944	88593066	LINC00461	hypomethylation	-0.47	0.24	0.71
chr5	88596057	88596885	LINC00461	hypomethylation	-0.38	0.46	0.84
chr5	88601646	88601828	LINC00461	hypomethylation	-0.39	0.4	0.79
chr5	88604035	88604803	LINC00461	hypomethylation	-0.46	0.53	0.98
chr5	88604892	88604946	LINC00461	hypomethylation	-0.36	0.64	1
chr5	88605321	88605883	LINC00461	hypomethylation	-0.42	0.32	0.74
chr5	88606759	88606962	LINC00461	hypomethylation	-0.37	0.58	0.94
chr5	88607292	88607784	LINC00461	hypomethylation	-0.42	0.4	0.82
chr5	88608246	88608383	LINC00461	hypomethylation	-0.39	0.5	0.89
chr5	88608862	88610453	LINC00461	hypomethylation	-0.43	0.42	0.85
chr5	88610785	88611378	LINC00461	hypomethylation	-0.39	0.41	0.8
chr5	88618889	88619616	LINC00461	hypomethylation	-0.47	0.49	0.96
chr5	88622291	88622329	LINC00461	hypomethylation	-0.43	0.48	0.9
chr5	88622947	88623674	LINC00461	hypomethylation	-0.38	0.53	0.91
chr5	88626443	88626985	LINC00461	hypomethylation	-0.44	0.5	0.94
chr5	88628962	88629543	LINC00461	hypomethylation	-0.32	0.5	0.82
chr5	88631969	88632498	LINC00461	hypomethylation	-0.36	0.54	0.9
chr5	88634482	88634816	LINC00461	hypomethylation	-0.4	0.33	0.73
chr5	88635113	88635280	LINC00461	hypomethylation	-0.3	0.53	0.83
chr5	88635282	88636420	LINC00461	hypomethylation	-0.45	0.45	0.91
chr5	88639671	88640750	LINC00461	hypomethylation	-0.4	0.49	0.9
chr5	88645199	88645790	LINC00461	hypomethylation	-0.38	0.54	0.92
chr5	88647603	88647958	LINC00461	hypomethylation	-0.35	0.26	0.61
chr5	88647974	88648639	LINC00461	hypomethylation	-0.34	0.5	0.84
chr5	88649190	88649492	LINC00461	hypomethylation	-0.36	0.53	0.89
chr5	88649897	88650567	LINC00461	hypomethylation	-0.36	0.46	0.82
chr5	88651450	88651645	LINC00461	hypomethylation	-0.48	0.43	0.91
chr5	88652123	88652593	LINC00461	hypomethylation	-0.41	0.29	0.7
chr5	88655296	88655925	LINC00461	hypomethylation	-0.46	0.29	0.75
chr5	88656185	88656326	LINC00461	hypomethylation	-0.37	0.41	0.79
chr5	88659627	88660070	LINC00461	hypermethylation	0.34	0.41	0.07
chr5	88672441	88672545	LINC00461	hypermethylation	0.36	0.56	0.21
chr5	88678314	88678323	LINC00461	hypermethylation	0.33	0.33	0
chr5	88684178	88684264	LINC00461	hypermethylation	0.37	0.4	0.04
chr5	88695214	88695406	LINC00461	hypermethylation	0.41	0.46	0.05
chr5	88697759	88698114	LINC00461	hypomethylation	-0.33	0.42	0.75
chr5	88698341	88699026	LINC00461	hypomethylation	-0.34	0.46	0.8
chr5	88699468	88700657	LINC00461	hypomethylation	-0.34	0.48	0.82
chr5	88659627	88660070	LINC00461	hypermethylation	0.34	0.41	0.07
chr5	88672441	88672545	LINC00461	hypermethylation	0.36	0.56	0.21
chr5	88678314	88678323	LINC00461	hypermethylation	0.33	0.33	0
chr5	88684178	88684264	LINC00461	hypermethylation	0.37	0.4	0.04
chr5	88689975	88690004	LINC00461	hypermethylation	0.32	0.39	0.07
chr5	88618889	88619616	LINC00461	hypomethylation	-0.47	0.49	0.96
chr5	88531167	88532707	LINC00461	hypomethylation	-0.45	0.43	0.87
chr5	88533454	88534007	LINC00461	hypomethylation	-0.39	0.43	0.82
chr5	88536109	88536427	LINC00461	hypomethylation	-0.35	0.28	0.63
chr5	88537926	88538139	LINC00461	hypomethylation	-0.44	0.5	0.93
chr5	88544549	88546095	LINC00461	hypomethylation	-0.43	0.36	0.79
chr5	88557694	88557882	LINC00461	hypomethylation	-0.32	0.34	0.66
chr5	88558428	88558627	LINC00461	hypomethylation	-0.33	0.63	0.97
chr5	88559707	88560514	LINC00461	hypomethylation	-0.41	0.46	0.87
chr5	88560924	88561614	LINC00461	hypomethylation	-0.37	0.53	0.9
chr5	88562419	88563086	LINC00461	hypomethylation	-0.41	0.44	0.85
chr5	88566896	88567552	LINC00461	hypomethylation	-0.39	0.39	0.79
chr5	88568674	88569301	LINC00461	hypomethylation	-0.38	0.56	0.93
chr5	88569743	88570367	LINC00461	hypomethylation	-0.4	0.47	0.87
chr5	88571530	88573771	LINC00461	hypomethylation	-0.47	0.39	0.86
chr5	88574216	88575327	LINC00461	hypomethylation	-0.4	0.36	0.76
chr5	88576179	88577090	LINC00461	hypomethylation	-0.42	0.34	0.76
chr5	88580485	88580886	LINC00461	hypomethylation	-0.36	0.34	0.71
chr5	88581610	88581703	LINC00461	hypomethylation	-0.35	0.65	1
chr5	88583302	88584608	LINC00461	hypomethylation	-0.4	0.42	0.82
chr5	88585765	88586244	LINC00461	hypomethylation	-0.34	0.58	0.92
chr5	88586335	88586813	LINC00461	hypomethylation	-0.37	0.5	0.87
chr5	88587077	88587675	LINC00461	hypomethylation	-0.39	0.16	0.56
chr5	88589476	88590860	LINC00461	hypomethylation	-0.48	0.41	0.89
chr5	88591861	88592289	LINC00461	hypomethylation	-0.41	0.24	0.65
chr5	88592944	88593066	LINC00461	hypomethylation	-0.47	0.24	0.71
chr5	88596057	88596885	LINC00461	hypomethylation	-0.38	0.46	0.84
chr5	88601646	88601828	LINC00461	hypomethylation	-0.39	0.4	0.79
chr5	88604035	88604803	LINC00461	hypomethylation	-0.46	0.53	0.98
chr5	88604892	88604946	LINC00461	hypomethylation	-0.36	0.64	1
chr5	88605321	88605883	LINC00461	hypomethylation	-0.42	0.32	0.74
chr5	88606759	88606962	LINC00461	hypomethylation	-0.37	0.58	0.94
chr5	88607292	88607784	LINC00461	hypomethylation	-0.42	0.4	0.82
chr5	88608246	88608383	LINC00461	hypomethylation	-0.39	0.5	0.89
chr5	88608862	88610453	LINC00461	hypomethylation	-0.43	0.42	0.85
chr5	88610785	88611378	LINC00461	hypomethylation	-0.39	0.41	0.8
chr5	88684178	88684264	LINC00461	hypermethylation	0.37	0.4	0.04
chr5	88659627	88660070	LINC00461	hypermethylation	0.34	0.41	0.07
chr5	88672441	88672545	LINC00461	hypermethylation	0.36	0.56	0.21
chr5	88678314	88678323	LINC00461	hypermethylation	0.33	0.33	0
chr5	88684178	88684264	LINC00461	hypermethylation	0.37	0.4	0.04
chr5	88531167	88532707	LINC00461	hypomethylation	-0.45	0.43	0.87
chr5	88533454	88534007	LINC00461	hypomethylation	-0.39	0.43	0.82
chr5	88536109	88536427	LINC00461	hypomethylation	-0.35	0.28	0.63
chr5	88537926	88538139	LINC00461	hypomethylation	-0.44	0.5	0.93
chr5	88544549	88546095	LINC00461	hypomethylation	-0.43	0.36	0.79
chr5	88557694	88557882	LINC00461	hypomethylation	-0.32	0.34	0.66
chr5	88558428	88558627	LINC00461	hypomethylation	-0.33	0.63	0.97
chr5	88559707	88560514	LINC00461	hypomethylation	-0.41	0.46	0.87
chr5	88560924	88561614	LINC00461	hypomethylation	-0.37	0.53	0.9
chr5	88562419	88563086	LINC00461	hypomethylation	-0.41	0.44	0.85
chr5	88566896	88567552	LINC00461	hypomethylation	-0.39	0.39	0.79
chr5	88568674	88569301	LINC00461	hypomethylation	-0.38	0.56	0.93
chr5	88569743	88570367	LINC00461	hypomethylation	-0.4	0.47	0.87
chr5	88571530	88573771	LINC00461	hypomethylation	-0.47	0.39	0.86
chr5	88574216	88575327	LINC00461	hypomethylation	-0.4	0.36	0.76
chr5	88576179	88577090	LINC00461	hypomethylation	-0.42	0.34	0.76
chr5	88580485	88580886	LINC00461	hypomethylation	-0.36	0.34	0.71
chr5	88581610	88581703	LINC00461	hypomethylation	-0.35	0.65	1
chr5	88583302	88584608	LINC00461	hypomethylation	-0.4	0.42	0.82
chr5	88585765	88586244	LINC00461	hypomethylation	-0.34	0.58	0.92
chr5	88586335	88586813	LINC00461	hypomethylation	-0.37	0.5	0.87
chr5	88587077	88587675	LINC00461	hypomethylation	-0.39	0.16	0.56
chr5	88589476	88590860	LINC00461	hypomethylation	-0.48	0.41	0.89
chr5	88591861	88592289	LINC00461	hypomethylation	-0.41	0.24	0.65
chr5	88592944	88593066	LINC00461	hypomethylation	-0.47	0.24	0.71
chr5	88596057	88596885	LINC00461	hypomethylation	-0.38	0.46	0.84
chr5	88601646	88601828	LINC00461	hypomethylation	-0.39	0.4	0.79
chr5	88604035	88604803	LINC00461	hypomethylation	-0.46	0.53	0.98
chr5	88604892	88604946	LINC00461	hypomethylation	-0.36	0.64	1
chr5	88605321	88605883	LINC00461	hypomethylation	-0.42	0.32	0.74
chr5	88606759	88606962	LINC00461	hypomethylation	-0.37	0.58	0.94
chr5	88607292	88607784	LINC00461	hypomethylation	-0.42	0.4	0.82
chr5	88608246	88608383	LINC00461	hypomethylation	-0.39	0.5	0.89
chr5	88608862	88610453	LINC00461	hypomethylation	-0.43	0.42	0.85
chr5	88610785	88611378	LINC00461	hypomethylation	-0.39	0.41	0.8
chr5	88618889	88619616	LINC00461	hypomethylation	-0.47	0.49	0.96
chr5	88622291	88622329	LINC00461	hypomethylation	-0.43	0.48	0.9
chr5	88622947	88623674	LINC00461	hypomethylation	-0.38	0.53	0.91
chr5	88626443	88626985	LINC00461	hypomethylation	-0.44	0.5	0.94
chr5	88628962	88629543	LINC00461	hypomethylation	-0.32	0.5	0.82
chr5	88631969	88632498	LINC00461	hypomethylation	-0.36	0.54	0.9
chr5	88634482	88634816	LINC00461	hypomethylation	-0.4	0.33	0.73
chr5	88635113	88635280	LINC00461	hypomethylation	-0.3	0.53	0.83
chr5	88635282	88636420	LINC00461	hypomethylation	-0.45	0.45	0.91
chr5	88639671	88640750	LINC00461	hypomethylation	-0.4	0.49	0.9
chr5	88645199	88645790	LINC00461	hypomethylation	-0.38	0.54	0.92
chr5	88647603	88647958	LINC00461	hypomethylation	-0.35	0.26	0.61
chr5	88647974	88648639	LINC00461	hypomethylation	-0.34	0.5	0.84
chr5	88649190	88649492	LINC00461	hypomethylation	-0.36	0.53	0.89
chr5	88649897	88650567	LINC00461	hypomethylation	-0.36	0.46	0.82
chr5	88651450	88651645	LINC00461	hypomethylation	-0.48	0.43	0.91
chr5	88652123	88652593	LINC00461	hypomethylation	-0.41	0.29	0.7
chr5	88655296	88655925	LINC00461	hypomethylation	-0.46	0.29	0.75
chr5	88656185	88656326	LINC00461	hypomethylation	-0.37	0.41	0.79
chr5	88659627	88660070	LINC00461	hypermethylation	0.34	0.41	0.07
chr5	88672441	88672545	LINC00461	hypermethylation	0.36	0.56	0.21
chr5	88678314	88678323	LINC00461	hypermethylation	0.33	0.33	0
chr5	88531167	88532707	LINC00461	hypomethylation	-0.45	0.43	0.87
chr5	88533454	88534007	LINC00461	hypomethylation	-0.39	0.43	0.82
chr5	88536109	88536427	LINC00461	hypomethylation	-0.35	0.28	0.63
chr5	88537926	88538139	LINC00461	hypomethylation	-0.44	0.5	0.93
chr5	88659607	88659835	LINC00461	hypermethylation	0.34	0.41	0.07
chr5	88544549	88546095	LINC00461	hypomethylation	-0.43	0.36	0.79
chr5	88557694	88557882	LINC00461	hypomethylation	-0.32	0.34	0.66
chr5	88558428	88558627	LINC00461	hypomethylation	-0.33	0.63	0.97
chr5	88559707	88560514	LINC00461	hypomethylation	-0.41	0.46	0.87
chr5	88560924	88561614	LINC00461	hypomethylation	-0.37	0.53	0.9
chr5	88562419	88563086	LINC00461	hypomethylation	-0.41	0.44	0.85
chr5	88566896	88567552	LINC00461	hypomethylation	-0.39	0.39	0.79
chr5	88568674	88569301	LINC00461	hypomethylation	-0.38	0.56	0.93
chr5	88569743	88570367	LINC00461	hypomethylation	-0.4	0.47	0.87
chr5	88571530	88573771	LINC00461	hypomethylation	-0.47	0.39	0.86
chr5	88574216	88575327	LINC00461	hypomethylation	-0.4	0.36	0.76
chr5	88576179	88577090	LINC00461	hypomethylation	-0.42	0.34	0.76
chr5	88580485	88580886	LINC00461	hypomethylation	-0.36	0.34	0.71
chr5	88581610	88581703	LINC00461	hypomethylation	-0.35	0.65	1
chr5	88583302	88584608	LINC00461	hypomethylation	-0.4	0.42	0.82
chr5	88585765	88586244	LINC00461	hypomethylation	-0.34	0.58	0.92
chr5	88586335	88586813	LINC00461	hypomethylation	-0.37	0.5	0.87
chr5	88587077	88587675	LINC00461	hypomethylation	-0.39	0.16	0.56
chr5	88589476	88590860	LINC00461	hypomethylation	-0.48	0.41	0.89
chr5	88591861	88592289	LINC00461	hypomethylation	-0.41	0.24	0.65
chr5	88592944	88593066	LINC00461	hypomethylation	-0.47	0.24	0.71
chr5	88596057	88596885	LINC00461	hypomethylation	-0.38	0.46	0.84
chr5	88601646	88601828	LINC00461	hypomethylation	-0.39	0.4	0.79
chr5	88604035	88604803	LINC00461	hypomethylation	-0.46	0.53	0.98
chr5	88604892	88604946	LINC00461	hypomethylation	-0.36	0.64	1
chr5	88605321	88605883	LINC00461	hypomethylation	-0.42	0.32	0.74
chr5	88606759	88606962	LINC00461	hypomethylation	-0.37	0.58	0.94
chr5	88607292	88607784	LINC00461	hypomethylation	-0.42	0.4	0.82
chr5	88608246	88608383	LINC00461	hypomethylation	-0.39	0.5	0.89
chr5	88608862	88610453	LINC00461	hypomethylation	-0.43	0.42	0.85
chr5	88610785	88611378	LINC00461	hypomethylation	-0.39	0.41	0.8
chr5	88618889	88619616	LINC00461	hypomethylation	-0.47	0.49	0.96
chr5	88622291	88622329	LINC00461	hypomethylation	-0.43	0.48	0.9
chr5	88622947	88623674	LINC00461	hypomethylation	-0.38	0.53	0.91
chr5	88626443	88626985	LINC00461	hypomethylation	-0.44	0.5	0.94
chr5	88628962	88629543	LINC00461	hypomethylation	-0.32	0.5	0.82
chr5	88631969	88632498	LINC00461	hypomethylation	-0.36	0.54	0.9
chr5	88634482	88634816	LINC00461	hypomethylation	-0.4	0.33	0.73
chr5	88635113	88635280	LINC00461	hypomethylation	-0.3	0.53	0.83
chr5	88635282	88636420	LINC00461	hypomethylation	-0.45	0.45	0.91
chr5	88639671	88640750	LINC00461	hypomethylation	-0.4	0.49	0.9
chr5	88645199	88645790	LINC00461	hypomethylation	-0.38	0.54	0.92
chr5	88647603	88647958	LINC00461	hypomethylation	-0.35	0.26	0.61
chr5	88647974	88648639	LINC00461	hypomethylation	-0.34	0.5	0.84
chr5	88649190	88649492	LINC00461	hypomethylation	-0.36	0.53	0.89
chr5	88649897	88650567	LINC00461	hypomethylation	-0.36	0.46	0.82
chr5	88651450	88651645	LINC00461	hypomethylation	-0.48	0.43	0.91
chr5	88652123	88652593	LINC00461	hypomethylation	-0.41	0.29	0.7
chr5	88655296	88655925	LINC00461	hypomethylation	-0.46	0.29	0.75
chr5	88656185	88656326	LINC00461	hypomethylation	-0.37	0.41	0.79
chr5	88689975	88690004	LINC00461	hypermethylation	0.32	0.39	0.07
chr5	88511707	88511958	LINC00461	hypomethylation	-0.39	0.38	0.76
chr5	88513614	88514536	LINC00461	hypomethylation	-0.35	0.51	0.85
chr5	88531167	88532707	LINC00461	hypomethylation	-0.45	0.43	0.87
chr5	88533454	88534007	LINC00461	hypomethylation	-0.39	0.43	0.82
chr5	88536109	88536427	LINC00461	hypomethylation	-0.35	0.28	0.63
chr5	88537926	88538139	LINC00461	hypomethylation	-0.44	0.5	0.93
chr5	88544549	88546095	LINC00461	hypomethylation	-0.43	0.36	0.79
chr5	88557694	88557882	LINC00461	hypomethylation	-0.32	0.34	0.66
chr5	88558428	88558627	LINC00461	hypomethylation	-0.33	0.63	0.97
chr5	88559707	88560514	LINC00461	hypomethylation	-0.41	0.46	0.87
chr5	88560924	88561614	LINC00461	hypomethylation	-0.37	0.53	0.9
chr5	88562419	88563086	LINC00461	hypomethylation	-0.41	0.44	0.85
chr5	88566896	88567552	LINC00461	hypomethylation	-0.39	0.39	0.79
chr5	88568674	88569301	LINC00461	hypomethylation	-0.38	0.56	0.93
chr5	88569743	88570367	LINC00461	hypomethylation	-0.4	0.47	0.87
chr5	88571530	88573771	LINC00461	hypomethylation	-0.47	0.39	0.86
chr5	88574216	88575327	LINC00461	hypomethylation	-0.4	0.36	0.76
chr5	88576179	88577090	LINC00461	hypomethylation	-0.42	0.34	0.76
chr5	88580485	88580886	LINC00461	hypomethylation	-0.36	0.34	0.71
chr5	88581610	88581703	LINC00461	hypomethylation	-0.35	0.65	1
chr5	88583302	88584608	LINC00461	hypomethylation	-0.4	0.42	0.82
chr5	88585765	88586244	LINC00461	hypomethylation	-0.34	0.58	0.92
chr5	88586335	88586813	LINC00461	hypomethylation	-0.37	0.5	0.87
chr5	88587077	88587675	LINC00461	hypomethylation	-0.39	0.16	0.56
chr5	88589476	88590860	LINC00461	hypomethylation	-0.48	0.41	0.89
chr5	88591861	88592289	LINC00461	hypomethylation	-0.41	0.24	0.65
chr5	88592944	88593066	LINC00461	hypomethylation	-0.47	0.24	0.71
chr5	88596057	88596885	LINC00461	hypomethylation	-0.38	0.46	0.84
chr5	88601646	88601828	LINC00461	hypomethylation	-0.39	0.4	0.79
chr5	88604035	88604803	LINC00461	hypomethylation	-0.46	0.53	0.98
chr5	88604892	88604946	LINC00461	hypomethylation	-0.36	0.64	1
chr5	88605321	88605883	LINC00461	hypomethylation	-0.42	0.32	0.74
chr5	88606759	88606962	LINC00461	hypomethylation	-0.37	0.58	0.94
chr5	88607292	88607784	LINC00461	hypomethylation	-0.42	0.4	0.82
chr5	88608246	88608383	LINC00461	hypomethylation	-0.39	0.5	0.89
chr5	88608862	88610453	LINC00461	hypomethylation	-0.43	0.42	0.85
chr5	88610785	88611378	LINC00461	hypomethylation	-0.39	0.41	0.8
chr5	88618889	88619616	LINC00461	hypomethylation	-0.47	0.49	0.96
chr5	88622291	88622329	LINC00461	hypomethylation	-0.43	0.48	0.9
chr5	88622947	88623674	LINC00461	hypomethylation	-0.38	0.53	0.91
chr5	88626443	88626985	LINC00461	hypomethylation	-0.44	0.5	0.94
chr5	88628962	88629543	LINC00461	hypomethylation	-0.32	0.5	0.82
chr5	88631969	88632498	LINC00461	hypomethylation	-0.36	0.54	0.9
chr5	88634482	88634816	LINC00461	hypomethylation	-0.4	0.33	0.73
chr5	88635113	88635280	LINC00461	hypomethylation	-0.3	0.53	0.83
chr5	88635282	88636420	LINC00461	hypomethylation	-0.45	0.45	0.91
chr5	88639671	88640750	LINC00461	hypomethylation	-0.4	0.49	0.9
chr5	88645199	88645790	LINC00461	hypomethylation	-0.38	0.54	0.92
chr5	88647603	88647958	LINC00461	hypomethylation	-0.35	0.26	0.61
chr5	88647974	88648639	LINC00461	hypomethylation	-0.34	0.5	0.84
chr5	88649190	88649492	LINC00461	hypomethylation	-0.36	0.53	0.89
chr5	88649897	88650567	LINC00461	hypomethylation	-0.36	0.46	0.82
chr5	88651450	88651645	LINC00461	hypomethylation	-0.48	0.43	0.91
chr5	88652123	88652593	LINC00461	hypomethylation	-0.41	0.29	0.7
chr5	88655296	88655925	LINC00461	hypomethylation	-0.46	0.29	0.75
chr5	88656185	88656326	LINC00461	hypomethylation	-0.37	0.41	0.79
chr5	88659627	88660070	LINC00461	hypermethylation	0.34	0.41	0.07
chr5	88672441	88672545	LINC00461	hypermethylation	0.36	0.56	0.21
chr5	88678314	88678323	LINC00461	hypermethylation	0.33	0.33	0
chr5	88684178	88684264	LINC00461	hypermethylation	0.37	0.4	0.04
chr5	88678314	88678323	LINC00461	hypermethylation	0.33	0.33	0
chr5	88684178	88684264	LINC00461	hypermethylation	0.37	0.4	0.04
chr5	88659627	88660070	LINC00461	hypermethylation	0.34	0.41	0.07
chr5	88672441	88672545	LINC00461	hypermethylation	0.36	0.56	0.21
chr5	88678314	88678323	LINC00461	hypermethylation	0.33	0.33	0
chr5	88655296	88655925	LINC00461	hypomethylation	-0.46	0.29	0.75
chr5	88656185	88656326	LINC00461	hypomethylation	-0.37	0.41	0.79
chr5	88659627	88660070	LINC00461	hypermethylation	0.34	0.41	0.07
chr5	88672441	88672545	LINC00461	hypermethylation	0.36	0.56	0.21
chr5	88689975	88690004	LINC00461	hypermethylation	0.32	0.39	0.07
chr5	88659627	88660070	LINC00461	hypermethylation	0.34	0.41	0.07
chr5	88672441	88672545	LINC00461	hypermethylation	0.36	0.56	0.21
chr5	88678314	88678323	LINC00461	hypermethylation	0.33	0.33	0
chr5	88684178	88684264	LINC00461	hypermethylation	0.37	0.4	0.04
chr5	88678314	88678323	LINC00461	hypermethylation	0.33	0.33	0
chr5	88655296	88655925	LINC00461	hypomethylation	-0.46	0.29	0.75
chr5	88656185	88656326	LINC00461	hypomethylation	-0.37	0.41	0.79
chr5	88659627	88660070	LINC00461	hypermethylation	0.34	0.41	0.07
chr5	88672441	88672545	LINC00461	hypermethylation	0.36	0.56	0.21
chr5	83576278	83576672	VCAN-AS1	hypomethylation	-0.4	0.49	0.9
chr5	88689975	88690004	LINC00461	hypermethylation	0.32	0.39	0.07
chr5	88655296	88655925	LINC00461	hypomethylation	-0.46	0.29	0.75
chr5	88656185	88656326	LINC00461	hypomethylation	-0.37	0.41	0.79
chr5	88659627	88660070	LINC00461	hypermethylation	0.34	0.41	0.07
chr5	88672441	88672545	LINC00461	hypermethylation	0.36	0.56	0.21
chr5	88678314	88678323	LINC00461	hypermethylation	0.33	0.33	0
chr5	88684178	88684264	LINC00461	hypermethylation	0.37	0.4	0.04
chr5	88689975	88690004	LINC00461	hypermethylation	0.32	0.39	0.07
chr5	88531167	88532707	LINC00461	hypomethylation	-0.45	0.43	0.87
chr5	88533454	88534007	LINC00461	hypomethylation	-0.39	0.43	0.82
chr5	88536109	88536427	LINC00461	hypomethylation	-0.35	0.28	0.63
chr5	88537926	88538139	LINC00461	hypomethylation	-0.44	0.5	0.93
chr5	88544549	88546095	LINC00461	hypomethylation	-0.43	0.36	0.79
chr5	88557694	88557882	LINC00461	hypomethylation	-0.32	0.34	0.66
chr5	88558428	88558627	LINC00461	hypomethylation	-0.33	0.63	0.97
chr5	88559707	88560514	LINC00461	hypomethylation	-0.41	0.46	0.87
chr5	88560924	88561614	LINC00461	hypomethylation	-0.37	0.53	0.9
chr5	88562419	88563086	LINC00461	hypomethylation	-0.41	0.44	0.85
chr5	88566896	88567552	LINC00461	hypomethylation	-0.39	0.39	0.79
chr5	88568674	88569301	LINC00461	hypomethylation	-0.38	0.56	0.93
chr5	88569743	88570367	LINC00461	hypomethylation	-0.4	0.47	0.87
chr5	88571530	88573771	LINC00461	hypomethylation	-0.47	0.39	0.86
chr5	88574216	88575327	LINC00461	hypomethylation	-0.4	0.36	0.76
chr5	88576179	88577090	LINC00461	hypomethylation	-0.42	0.34	0.76
chr5	88580485	88580886	LINC00461	hypomethylation	-0.36	0.34	0.71
chr5	88581610	88581703	LINC00461	hypomethylation	-0.35	0.65	1
chr5	88583302	88584608	LINC00461	hypomethylation	-0.4	0.42	0.82
chr5	88585765	88586244	LINC00461	hypomethylation	-0.34	0.58	0.92
chr5	88586335	88586813	LINC00461	hypomethylation	-0.37	0.5	0.87
chr5	88587077	88587675	LINC00461	hypomethylation	-0.39	0.16	0.56
chr5	88589476	88590860	LINC00461	hypomethylation	-0.48	0.41	0.89
chr5	88591861	88592289	LINC00461	hypomethylation	-0.41	0.24	0.65
chr5	88592944	88593066	LINC00461	hypomethylation	-0.47	0.24	0.71
chr5	88596057	88596885	LINC00461	hypomethylation	-0.38	0.46	0.84
chr5	88601646	88601828	LINC00461	hypomethylation	-0.39	0.4	0.79
chr5	88604035	88604803	LINC00461	hypomethylation	-0.46	0.53	0.98
chr5	88604892	88604946	LINC00461	hypomethylation	-0.36	0.64	1
chr5	88605321	88605883	LINC00461	hypomethylation	-0.42	0.32	0.74
chr5	88606759	88606962	LINC00461	hypomethylation	-0.37	0.58	0.94
chr5	88607292	88607784	LINC00461	hypomethylation	-0.42	0.4	0.82
chr5	88608246	88608383	LINC00461	hypomethylation	-0.39	0.5	0.89
chr5	88608862	88610453	LINC00461	hypomethylation	-0.43	0.42	0.85
chr5	88610785	88611378	LINC00461	hypomethylation	-0.39	0.41	0.8
chr5	88618889	88619616	LINC00461	hypomethylation	-0.47	0.49	0.96
chr5	88622291	88622329	LINC00461	hypomethylation	-0.43	0.48	0.9
chr5	88622947	88623674	LINC00461	hypomethylation	-0.38	0.53	0.91
chr5	88626443	88626985	LINC00461	hypomethylation	-0.44	0.5	0.94
chr5	88628962	88629543	LINC00461	hypomethylation	-0.32	0.5	0.82
chr5	88631969	88632498	LINC00461	hypomethylation	-0.36	0.54	0.9
chr5	88634482	88634816	LINC00461	hypomethylation	-0.4	0.33	0.73
chr5	88635113	88635280	LINC00461	hypomethylation	-0.3	0.53	0.83
chr5	88635282	88636420	LINC00461	hypomethylation	-0.45	0.45	0.91
chr5	88639671	88640750	LINC00461	hypomethylation	-0.4	0.49	0.9
chr5	88645199	88645790	LINC00461	hypomethylation	-0.38	0.54	0.92
chr5	88647603	88647958	LINC00461	hypomethylation	-0.35	0.26	0.61
chr5	88647974	88648639	LINC00461	hypomethylation	-0.34	0.5	0.84
chr5	88649190	88649492	LINC00461	hypomethylation	-0.36	0.53	0.89
chr5	88649897	88650567	LINC00461	hypomethylation	-0.36	0.46	0.82
chr5	88651450	88651645	LINC00461	hypomethylation	-0.48	0.43	0.91
chr5	88652123	88652593	LINC00461	hypomethylation	-0.41	0.29	0.7
chr5	88655296	88655925	LINC00461	hypomethylation	-0.46	0.29	0.75
chr5	88656185	88656326	LINC00461	hypomethylation	-0.37	0.41	0.79
chr5	88659627	88660070	LINC00461	hypermethylation	0.34	0.41	0.07
chr5	88672441	88672545	LINC00461	hypermethylation	0.36	0.56	0.21
chr5	88678314	88678323	LINC00461	hypermethylation	0.33	0.33	0
chr5	88684178	88684264	LINC00461	hypermethylation	0.37	0.4	0.04
chr6	165993007	165993809	LINC00473	hypomethylation	-0.42	0.54	0.97
chr6	165994038	165995577	LINC00473	hypomethylation	-0.44	0.38	0.81
chr6	165995791	165996690	LINC00473	hypomethylation	-0.47	0.33	0.8
chr6	165941268	165941753	LINC00473	hypomethylation	-0.34	0.63	0.97
chr6	165942339	165942521	LINC00473	hypomethylation	-0.41	0.47	0.88
chr6	165942583	165942794	LINC00473	hypomethylation	-0.43	0.52	0.95
chr6	165943489	165943666	LINC00473	hypomethylation	-0.45	0.51	0.96
chr6	165944580	165945946	LINC00473	hypomethylation	-0.44	0.36	0.8
chr6	165951358	165951711	LINC00473	hypomethylation	-0.37	0.51	0.88
chr6	165953814	165954201	LINC00473	hypomethylation	-0.34	0.54	0.88
chr6	165954400	165954654	LINC00473	hypomethylation	-0.45	0.28	0.73
chr6	165957725	165957997	LINC00473	hypomethylation	-0.42	0.49	0.91
chr6	165958048	165958175	LINC00473	hypomethylation	-0.43	0.57	1
chr6	165958235	165958309	LINC00473	hypomethylation	-0.43	0.57	1
chr6	165958407	165958856	LINC00473	hypomethylation	-0.4	0.54	0.94
chr6	165960716	165960768	LINC00473	hypomethylation	-0.36	0.64	1
chr6	165961413	165962198	LINC00473	hypomethylation	-0.41	0.47	0.88
chr6	165963437	165963717	LINC00473	hypomethylation	-0.31	0.66	0.98
chr6	165964606	165964897	LINC00473	hypomethylation	-0.45	0.39	0.84
chr6	165966338	165967098	LINC00473	hypomethylation	-0.38	0.55	0.92
chr6	165967248	165967412	LINC00473	hypomethylation	-0.48	0.31	0.79
chr6	165968104	165968367	LINC00473	hypomethylation	-0.51	0.4	0.91
chr6	165968994	165969449	LINC00473	hypomethylation	-0.42	0.35	0.77
chr6	165969897	165970477	LINC00473	hypomethylation	-0.44	0.37	0.81
chr6	165971113	165971291	LINC00473	hypomethylation	-0.47	0.47	0.94
chr6	165972264	165972347	LINC00473	hypomethylation	-0.39	0.47	0.86
chr6	165973023	165973204	LINC00473	hypomethylation	-0.45	0.52	0.97
chr6	165975195	165976046	LINC00473	hypomethylation	-0.39	0.47	0.86
chr6	165976313	165976612	LINC00473	hypomethylation	-0.35	0.53	0.88
chr6	165976938	165977277	LINC00473	hypomethylation	-0.32	0.47	0.8
chr6	165978915	165979771	LINC00473	hypomethylation	-0.46	0.38	0.84
chr6	165980479	165980850	LINC00473	hypomethylation	-0.37	0.57	0.93
chr6	165981224	165981744	LINC00473	hypomethylation	-0.33	0.48	0.81
chr6	165981829	165982211	LINC00473	hypomethylation	-0.36	0.61	0.97
chr6	165982677	165983485	LINC00473	hypomethylation	-0.45	0.37	0.81
chr6	165993007	165993809	LINC00473	hypomethylation	-0.42	0.54	0.97
chr6	165994038	165995577	LINC00473	hypomethylation	-0.44	0.38	0.81
chr6	165995791	165996690	LINC00473	hypomethylation	-0.47	0.33	0.8
chr6	165930695	165930871	LINC00473	hypomethylation	-0.41	0.5	0.91
chr6	165931082	165931419	LINC00473	hypomethylation	-0.37	0.37	0.74
chr6	165932985	165933477	LINC00473	hypomethylation	-0.41	0.34	0.75
chr6	165934988	165936419	LINC00473	hypomethylation	-0.38	0.44	0.83
chr6	165936429	165936791	LINC00473	hypomethylation	-0.39	0.36	0.75
chr6	165941268	165941753	LINC00473	hypomethylation	-0.34	0.63	0.97
chr6	165942339	165942521	LINC00473	hypomethylation	-0.41	0.47	0.88
chr6	165942583	165942794	LINC00473	hypomethylation	-0.43	0.52	0.95
chr6	165943489	165943666	LINC00473	hypomethylation	-0.45	0.51	0.96
chr6	165944580	165945946	LINC00473	hypomethylation	-0.44	0.36	0.8
chr6	165947441	165948079	LINC00473	hypomethylation	-0.44	0.36	0.79
chr6	165951358	165951711	LINC00473	hypomethylation	-0.37	0.51	0.88
chr6	165953814	165954201	LINC00473	hypomethylation	-0.34	0.54	0.88
chr6	165954400	165954654	LINC00473	hypomethylation	-0.45	0.28	0.73
chr6	165957725	165957997	LINC00473	hypomethylation	-0.42	0.49	0.91
chr6	165958048	165958175	LINC00473	hypomethylation	-0.43	0.57	1
chr6	165958235	165958309	LINC00473	hypomethylation	-0.43	0.57	1
chr6	165958407	165958856	LINC00473	hypomethylation	-0.4	0.54	0.94
chr6	165960716	165960768	LINC00473	hypomethylation	-0.36	0.64	1
chr6	165961413	165962198	LINC00473	hypomethylation	-0.41	0.47	0.88
chr6	165963437	165963717	LINC00473	hypomethylation	-0.31	0.66	0.98
chr6	165964606	165964897	LINC00473	hypomethylation	-0.45	0.39	0.84
chr6	165966338	165967098	LINC00473	hypomethylation	-0.38	0.55	0.92
chr6	165967248	165967412	LINC00473	hypomethylation	-0.48	0.31	0.79
chr6	165968104	165968367	LINC00473	hypomethylation	-0.51	0.4	0.91
chr6	165968994	165969449	LINC00473	hypomethylation	-0.42	0.35	0.77
chr6	165969897	165970477	LINC00473	hypomethylation	-0.44	0.37	0.81
chr6	165971113	165971291	LINC00473	hypomethylation	-0.47	0.47	0.94
chr6	165972264	165972347	LINC00473	hypomethylation	-0.39	0.47	0.86
chr6	165973023	165973204	LINC00473	hypomethylation	-0.45	0.52	0.97
chr6	165975195	165976046	LINC00473	hypomethylation	-0.39	0.47	0.86
chr6	165976313	165976612	LINC00473	hypomethylation	-0.35	0.53	0.88
chr6	165976938	165977277	LINC00473	hypomethylation	-0.32	0.47	0.8
chr6	165978915	165979771	LINC00473	hypomethylation	-0.46	0.38	0.84
chr6	165980479	165980850	LINC00473	hypomethylation	-0.37	0.57	0.93
chr6	165981224	165981744	LINC00473	hypomethylation	-0.33	0.48	0.81
chr6	165981829	165982211	LINC00473	hypomethylation	-0.36	0.61	0.97
chr6	165982677	165983485	LINC00473	hypomethylation	-0.45	0.37	0.81
chr6	10435475	10435549	LINC00518	hypomethylation	-0.38	0.37	0.75
chr6	10435563	10435600	LINC00518	hypomethylation	-0.4	0.27	0.67
chr6	10441696	10441856	LINC00518	hypomethylation	-0.5	0.3	0.79
chr6	10421811	10421888	LINC00518	hypermethylation	0.42	0.42	0
chr6	10425361	10425408	LINC00518	hypermethylation	0.4	0.57	0.16
chr6	10435475	10435549	LINC00518	hypomethylation	-0.38	0.37	0.75
chr6	10435563	10435600	LINC00518	hypomethylation	-0.4	0.27	0.67
chr6	10441696	10441856	LINC00518	hypomethylation	-0.5	0.3	0.79
chr6	10421811	10421888	LINC00518	hypermethylation	0.42	0.42	0
chr6	10425361	10425408	LINC00518	hypermethylation	0.4	0.57	0.16
chr6	167997078	167997761	KIF25-AS1	hypomethylation	-0.37	0.29	0.66
chr6	10435475	10435549	LINC00518	hypomethylation	-0.38	0.37	0.75
chr6	10435563	10435600	LINC00518	hypomethylation	-0.4	0.27	0.67
chr6	10441696	10441856	LINC00518	hypomethylation	-0.5	0.3	0.79
chr6	10421811	10421888	LINC00518	hypermethylation	0.42	0.42	0
chr6	10425361	10425408	LINC00518	hypermethylation	0.4	0.57	0.16
chr6	159247577	159248220	FNDC1-IT1	hypomethylation	-0.36	0.33	0.69
chr6	165993007	165993809	LINC00473	hypomethylation	-0.42	0.54	0.97
chr6	165994038	165995577	LINC00473	hypomethylation	-0.44	0.38	0.81
chr6	165995791	165996690	LINC00473	hypomethylation	-0.47	0.33	0.8
chr6	165930695	165930871	LINC00473	hypomethylation	-0.41	0.5	0.91
chr6	165931082	165931419	LINC00473	hypomethylation	-0.37	0.37	0.74
chr6	165932985	165933477	LINC00473	hypomethylation	-0.41	0.34	0.75
chr6	165934988	165936419	LINC00473	hypomethylation	-0.38	0.44	0.83
chr6	165936429	165936791	LINC00473	hypomethylation	-0.39	0.36	0.75
chr6	165941268	165941753	LINC00473	hypomethylation	-0.34	0.63	0.97
chr6	165942339	165942521	LINC00473	hypomethylation	-0.41	0.47	0.88
chr6	165942583	165942794	LINC00473	hypomethylation	-0.43	0.52	0.95
chr6	165943489	165943666	LINC00473	hypomethylation	-0.45	0.51	0.96
chr6	165944580	165945946	LINC00473	hypomethylation	-0.44	0.36	0.8
chr6	165947441	165948079	LINC00473	hypomethylation	-0.44	0.36	0.79
chr6	165951358	165951711	LINC00473	hypomethylation	-0.37	0.51	0.88
chr6	165953814	165954201	LINC00473	hypomethylation	-0.34	0.54	0.88
chr6	165954400	165954654	LINC00473	hypomethylation	-0.45	0.28	0.73
chr6	165957725	165957997	LINC00473	hypomethylation	-0.42	0.49	0.91
chr6	165958048	165958175	LINC00473	hypomethylation	-0.43	0.57	1
chr6	165958235	165958309	LINC00473	hypomethylation	-0.43	0.57	1
chr6	165958407	165958856	LINC00473	hypomethylation	-0.4	0.54	0.94
chr6	165960716	165960768	LINC00473	hypomethylation	-0.36	0.64	1
chr6	165961413	165962198	LINC00473	hypomethylation	-0.41	0.47	0.88
chr6	165963437	165963717	LINC00473	hypomethylation	-0.31	0.66	0.98
chr6	165964606	165964897	LINC00473	hypomethylation	-0.45	0.39	0.84
chr6	165966338	165967098	LINC00473	hypomethylation	-0.38	0.55	0.92
chr6	165967248	165967412	LINC00473	hypomethylation	-0.48	0.31	0.79
chr6	165968104	165968367	LINC00473	hypomethylation	-0.51	0.4	0.91
chr6	165968994	165969449	LINC00473	hypomethylation	-0.42	0.35	0.77
chr6	165969897	165970477	LINC00473	hypomethylation	-0.44	0.37	0.81
chr6	165971113	165971291	LINC00473	hypomethylation	-0.47	0.47	0.94
chr6	165972264	165972347	LINC00473	hypomethylation	-0.39	0.47	0.86
chr6	165973023	165973204	LINC00473	hypomethylation	-0.45	0.52	0.97
chr6	165975195	165976046	LINC00473	hypomethylation	-0.39	0.47	0.86
chr6	165976313	165976612	LINC00473	hypomethylation	-0.35	0.53	0.88
chr6	165976938	165977277	LINC00473	hypomethylation	-0.32	0.47	0.8
chr6	165978915	165979771	LINC00473	hypomethylation	-0.46	0.38	0.84
chr6	165980479	165980850	LINC00473	hypomethylation	-0.37	0.57	0.93
chr6	165981224	165981744	LINC00473	hypomethylation	-0.33	0.48	0.81
chr6	165981829	165982211	LINC00473	hypomethylation	-0.36	0.61	0.97
chr6	165982677	165983485	LINC00473	hypomethylation	-0.45	0.37	0.81
chr6	10435475	10435549	LINC00518	hypomethylation	-0.38	0.37	0.75
chr6	10435563	10435600	LINC00518	hypomethylation	-0.4	0.27	0.67
chr6	10441696	10441856	LINC00518	hypomethylation	-0.5	0.3	0.79
chr6	10421811	10421888	LINC00518	hypermethylation	0.42	0.42	0
chr6	10425361	10425408	LINC00518	hypermethylation	0.4	0.57	0.16
chr6	10435475	10435549	LINC00518	hypomethylation	-0.38	0.37	0.75
chr6	10435563	10435600	LINC00518	hypomethylation	-0.4	0.27	0.67
chr6	10441696	10441856	LINC00518	hypomethylation	-0.5	0.3	0.79
chr6	10421811	10421888	LINC00518	hypermethylation	0.42	0.42	0
chr6	10425361	10425408	LINC00518	hypermethylation	0.4	0.57	0.16
chr6	167997078	167997761	KIF25-AS1	hypomethylation	-0.37	0.29	0.66
chr6	165993007	165993809	LINC00473	hypomethylation	-0.42	0.54	0.97
chr6	165994038	165995577	LINC00473	hypomethylation	-0.44	0.38	0.81
chr6	165995791	165996690	LINC00473	hypomethylation	-0.47	0.33	0.8
chr6	165941268	165941753	LINC00473	hypomethylation	-0.34	0.63	0.97
chr6	165942339	165942521	LINC00473	hypomethylation	-0.41	0.47	0.88
chr6	165942583	165942794	LINC00473	hypomethylation	-0.43	0.52	0.95
chr6	165943489	165943666	LINC00473	hypomethylation	-0.45	0.51	0.96
chr6	165944580	165945946	LINC00473	hypomethylation	-0.44	0.36	0.8
chr6	165951358	165951711	LINC00473	hypomethylation	-0.37	0.51	0.88
chr6	165953814	165954201	LINC00473	hypomethylation	-0.34	0.54	0.88
chr6	165954400	165954654	LINC00473	hypomethylation	-0.45	0.28	0.73
chr6	165957725	165957997	LINC00473	hypomethylation	-0.42	0.49	0.91
chr6	165958048	165958175	LINC00473	hypomethylation	-0.43	0.57	1
chr6	165958235	165958309	LINC00473	hypomethylation	-0.43	0.57	1
chr6	165958407	165958856	LINC00473	hypomethylation	-0.4	0.54	0.94
chr6	165960716	165960768	LINC00473	hypomethylation	-0.36	0.64	1
chr6	165961413	165962198	LINC00473	hypomethylation	-0.41	0.47	0.88
chr6	165963437	165963717	LINC00473	hypomethylation	-0.31	0.66	0.98
chr6	165964606	165964897	LINC00473	hypomethylation	-0.45	0.39	0.84
chr6	165966338	165967098	LINC00473	hypomethylation	-0.38	0.55	0.92
chr6	165967248	165967412	LINC00473	hypomethylation	-0.48	0.31	0.79
chr6	165968104	165968367	LINC00473	hypomethylation	-0.51	0.4	0.91
chr6	165968994	165969449	LINC00473	hypomethylation	-0.42	0.35	0.77
chr6	165969897	165970477	LINC00473	hypomethylation	-0.44	0.37	0.81
chr6	165971113	165971291	LINC00473	hypomethylation	-0.47	0.47	0.94
chr6	165972264	165972347	LINC00473	hypomethylation	-0.39	0.47	0.86
chr6	165973023	165973204	LINC00473	hypomethylation	-0.45	0.52	0.97
chr6	165975195	165976046	LINC00473	hypomethylation	-0.39	0.47	0.86
chr6	165976313	165976612	LINC00473	hypomethylation	-0.35	0.53	0.88
chr6	165976938	165977277	LINC00473	hypomethylation	-0.32	0.47	0.8
chr6	165978915	165979771	LINC00473	hypomethylation	-0.46	0.38	0.84
chr6	165980479	165980850	LINC00473	hypomethylation	-0.37	0.57	0.93
chr6	165981224	165981744	LINC00473	hypomethylation	-0.33	0.48	0.81
chr6	165981829	165982211	LINC00473	hypomethylation	-0.36	0.61	0.97
chr6	165982677	165983485	LINC00473	hypomethylation	-0.45	0.37	0.81
chr6	165993007	165993809	LINC00473	hypomethylation	-0.42	0.54	0.97
chr6	165994038	165995577	LINC00473	hypomethylation	-0.44	0.38	0.81
chr6	165995791	165996690	LINC00473	hypomethylation	-0.47	0.33	0.8
chr6	165898802	165898897	LINC00473	hypomethylation	-0.47	0.48	0.95
chr6	165901526	165901940	LINC00473	hypomethylation	-0.34	0.52	0.86
chr6	165902785	165903679	LINC00473	hypomethylation	-0.37	0.48	0.85
chr6	165905074	165905556	LINC00473	hypomethylation	-0.39	0.46	0.85
chr6	165906306	165906463	LINC00473	hypomethylation	-0.38	0.56	0.94
chr6	165910808	165910867	LINC00473	hypomethylation	-0.34	0.35	0.69
chr6	165915958	165916369	LINC00473	hypomethylation	-0.38	0.43	0.81
chr6	165916675	165917004	LINC00473	hypomethylation	-0.41	0.38	0.79
chr6	165917131	165917489	LINC00473	hypomethylation	-0.36	0.6	0.96
chr6	165917806	165918040	LINC00473	hypomethylation	-0.49	0.47	0.96
chr6	165918495	165918699	LINC00473	hypomethylation	-0.36	0.51	0.87
chr6	165921104	165921506	LINC00473	hypomethylation	-0.4	0.29	0.69
chr6	165923167	165923420	LINC00473	hypomethylation	-0.52	0.48	1
chr6	165923889	165924288	LINC00473	hypomethylation	-0.52	0.48	1
chr6	165924969	165925111	LINC00473	hypomethylation	-0.34	0.54	0.88
chr6	165926160	165926894	LINC00473	hypomethylation	-0.47	0.21	0.68
chr6	165927944	165928699	LINC00473	hypomethylation	-0.47	0.42	0.89
chr6	165929171	165929316	LINC00473	hypomethylation	-0.34	0.57	0.92
chr6	165930695	165930871	LINC00473	hypomethylation	-0.41	0.5	0.91
chr6	165931082	165931419	LINC00473	hypomethylation	-0.37	0.37	0.74
chr6	165932985	165933477	LINC00473	hypomethylation	-0.41	0.34	0.75
chr6	165934988	165936419	LINC00473	hypomethylation	-0.38	0.44	0.83
chr6	165936429	165936791	LINC00473	hypomethylation	-0.39	0.36	0.75
chr6	165941268	165941753	LINC00473	hypomethylation	-0.34	0.63	0.97
chr6	165942339	165942521	LINC00473	hypomethylation	-0.41	0.47	0.88
chr6	165942583	165942794	LINC00473	hypomethylation	-0.43	0.52	0.95
chr6	165943489	165943666	LINC00473	hypomethylation	-0.45	0.51	0.96
chr6	165944580	165945946	LINC00473	hypomethylation	-0.44	0.36	0.8
chr6	165947441	165948079	LINC00473	hypomethylation	-0.44	0.36	0.79
chr6	165951358	165951711	LINC00473	hypomethylation	-0.37	0.51	0.88
chr6	165953814	165954201	LINC00473	hypomethylation	-0.34	0.54	0.88
chr6	165954400	165954654	LINC00473	hypomethylation	-0.45	0.28	0.73
chr6	165957725	165957997	LINC00473	hypomethylation	-0.42	0.49	0.91
chr6	165958048	165958175	LINC00473	hypomethylation	-0.43	0.57	1
chr6	165958235	165958309	LINC00473	hypomethylation	-0.43	0.57	1
chr6	165958407	165958856	LINC00473	hypomethylation	-0.4	0.54	0.94
chr6	165960716	165960768	LINC00473	hypomethylation	-0.36	0.64	1
chr6	165961413	165962198	LINC00473	hypomethylation	-0.41	0.47	0.88
chr6	165963437	165963717	LINC00473	hypomethylation	-0.31	0.66	0.98
chr6	165964606	165964897	LINC00473	hypomethylation	-0.45	0.39	0.84
chr6	165966338	165967098	LINC00473	hypomethylation	-0.38	0.55	0.92
chr6	165967248	165967412	LINC00473	hypomethylation	-0.48	0.31	0.79
chr6	165968104	165968367	LINC00473	hypomethylation	-0.51	0.4	0.91
chr6	165968994	165969449	LINC00473	hypomethylation	-0.42	0.35	0.77
chr6	165969897	165970477	LINC00473	hypomethylation	-0.44	0.37	0.81
chr6	165971113	165971291	LINC00473	hypomethylation	-0.47	0.47	0.94
chr6	165972264	165972347	LINC00473	hypomethylation	-0.39	0.47	0.86
chr6	165973023	165973204	LINC00473	hypomethylation	-0.45	0.52	0.97
chr6	165975195	165976046	LINC00473	hypomethylation	-0.39	0.47	0.86
chr6	165976313	165976612	LINC00473	hypomethylation	-0.35	0.53	0.88
chr6	165976938	165977277	LINC00473	hypomethylation	-0.32	0.47	0.8
chr6	165978915	165979771	LINC00473	hypomethylation	-0.46	0.38	0.84
chr6	165980479	165980850	LINC00473	hypomethylation	-0.37	0.57	0.93
chr6	165981224	165981744	LINC00473	hypomethylation	-0.33	0.48	0.81
chr6	165981829	165982211	LINC00473	hypomethylation	-0.36	0.61	0.97
chr6	165982677	165983485	LINC00473	hypomethylation	-0.45	0.37	0.81
chr7	97013480	97013550	DLX6-AS1	hypermethylation	0.35	0.5	0.16
chr7	97021687	97021729	DLX6-AS1	hypermethylation	0.43	0.43	0
chr7	97021816	97021953	DLX6-AS1	hypermethylation	0.35	0.41	0.06
chr7	96989109	96989348	DLX6-AS1	hypermethylation	0.32	0.32	0
chr7	96990067	96990309	DLX6-AS1	hypermethylation	0.37	0.43	0.06
chr7	96991806	96991852	DLX6-AS1	hypermethylation	0.34	0.38	0.04
chr7	96991946	96992033	DLX6-AS1	hypermethylation	0.44	0.53	0.09
chr7	96992518	96992608	DLX6-AS1	hypermethylation	0.45	0.49	0.04
chr7	96992820	96993050	DLX6-AS1	hypermethylation	0.46	0.46	0
chr7	96993328	96993394	DLX6-AS1	hypermethylation	0.35	0.35	0
chr7	96997495	96997522	DLX6-AS1	hypermethylation	0.57	0.57	0
chr7	96997693	96997735	DLX6-AS1	hypermethylation	0.41	0.55	0.13
chr7	97002389	97002687	DLX6-AS1	hypermethylation	0.44	0.64	0.19
chr7	97003171	97003326	DLX6-AS1	hypermethylation	0.33	0.44	0.11
chr7	97007447	97007490	DLX6-AS1	hypermethylation	0.49	0.56	0.08
chr7	97013480	97013550	DLX6-AS1	hypermethylation	0.35	0.5	0.16
chr7	97021687	97021729	DLX6-AS1	hypermethylation	0.43	0.43	0
chr7	96961798	96962317	DLX6-AS1	hypomethylation	-0.39	0.36	0.75
chr7	96989109	96989348	DLX6-AS1	hypermethylation	0.32	0.32	0
chr7	96990067	96990309	DLX6-AS1	hypermethylation	0.37	0.43	0.06
chr7	96991806	96991852	DLX6-AS1	hypermethylation	0.34	0.38	0.04
chr7	96991946	96992033	DLX6-AS1	hypermethylation	0.44	0.53	0.09
chr7	96992518	96992608	DLX6-AS1	hypermethylation	0.45	0.49	0.04
chr7	96992820	96993050	DLX6-AS1	hypermethylation	0.46	0.46	0
chr7	96993328	96993394	DLX6-AS1	hypermethylation	0.35	0.35	0
chr7	96997495	96997522	DLX6-AS1	hypermethylation	0.57	0.57	0
chr7	96997693	96997735	DLX6-AS1	hypermethylation	0.41	0.55	0.13
chr7	97002389	97002687	DLX6-AS1	hypermethylation	0.44	0.64	0.19
chr7	97003171	97003326	DLX6-AS1	hypermethylation	0.33	0.44	0.11
chr7	97007447	97007490	DLX6-AS1	hypermethylation	0.49	0.56	0.08
chr7	39406503	39406793	POU6F2-AS1	hypomethylation	-0.51	0.29	0.8
chr7	39408118	39408385	POU6F2-AS1	hypomethylation	-0.33	0.62	0.95
chr7	97021687	97021729	DLX6-AS1	hypermethylation	0.43	0.43	0
chr7	97021816	97021953	DLX6-AS1	hypermethylation	0.35	0.41	0.06
chr7	97022212	97022255	DLX6-AS1	hypermethylation	0.39	0.45	0.06
chr7	96961798	96962317	DLX6-AS1	hypomethylation	-0.39	0.36	0.75
chr7	96989109	96989348	DLX6-AS1	hypermethylation	0.32	0.32	0
chr7	96990067	96990309	DLX6-AS1	hypermethylation	0.37	0.43	0.06
chr7	96991806	96991852	DLX6-AS1	hypermethylation	0.34	0.38	0.04
chr7	96991946	96992033	DLX6-AS1	hypermethylation	0.44	0.53	0.09
chr7	96992518	96992608	DLX6-AS1	hypermethylation	0.45	0.49	0.04
chr7	96992820	96993050	DLX6-AS1	hypermethylation	0.46	0.46	0
chr7	96993328	96993394	DLX6-AS1	hypermethylation	0.35	0.35	0
chr7	96997495	96997522	DLX6-AS1	hypermethylation	0.57	0.57	0
chr7	96997693	96997735	DLX6-AS1	hypermethylation	0.41	0.55	0.13
chr7	97002389	97002687	DLX6-AS1	hypermethylation	0.44	0.64	0.19
chr7	97003171	97003326	DLX6-AS1	hypermethylation	0.33	0.44	0.11
chr7	97007447	97007490	DLX6-AS1	hypermethylation	0.49	0.56	0.08
chr7	97013480	97013550	DLX6-AS1	hypermethylation	0.35	0.5	0.16
chr7	97021687	97021729	DLX6-AS1	hypermethylation	0.43	0.43	0
chr7	97021816	97021953	DLX6-AS1	hypermethylation	0.35	0.41	0.06
chr7	97022212	97022255	DLX6-AS1	hypermethylation	0.39	0.45	0.06
chr7	96961798	96962317	DLX6-AS1	hypomethylation	-0.39	0.36	0.75
chr7	96989109	96989348	DLX6-AS1	hypermethylation	0.32	0.32	0
chr7	96990067	96990309	DLX6-AS1	hypermethylation	0.37	0.43	0.06
chr7	96991806	96991852	DLX6-AS1	hypermethylation	0.34	0.38	0.04
chr7	96991946	96992033	DLX6-AS1	hypermethylation	0.44	0.53	0.09
chr7	96992518	96992608	DLX6-AS1	hypermethylation	0.45	0.49	0.04
chr7	96992820	96993050	DLX6-AS1	hypermethylation	0.46	0.46	0
chr7	96993328	96993394	DLX6-AS1	hypermethylation	0.35	0.35	0
chr7	96997495	96997522	DLX6-AS1	hypermethylation	0.57	0.57	0
chr7	96997693	96997735	DLX6-AS1	hypermethylation	0.41	0.55	0.13
chr7	97002389	97002687	DLX6-AS1	hypermethylation	0.44	0.64	0.19
chr7	97003171	97003326	DLX6-AS1	hypermethylation	0.33	0.44	0.11
chr7	97007447	97007490	DLX6-AS1	hypermethylation	0.49	0.56	0.08
chr7	97013480	97013550	DLX6-AS1	hypermethylation	0.35	0.5	0.16
chr7	97007447	97007490	DLX6-AS1	hypermethylation	0.49	0.56	0.08
chr7	97013480	97013550	DLX6-AS1	hypermethylation	0.35	0.5	0.16
chr7	96961798	96962317	DLX6-AS1	hypomethylation	-0.39	0.36	0.75
chr7	96989109	96989348	DLX6-AS1	hypermethylation	0.32	0.32	0
chr7	96990067	96990309	DLX6-AS1	hypermethylation	0.37	0.43	0.06
chr7	96991806	96991852	DLX6-AS1	hypermethylation	0.34	0.38	0.04
chr7	96991946	96992033	DLX6-AS1	hypermethylation	0.44	0.53	0.09
chr7	96992518	96992608	DLX6-AS1	hypermethylation	0.45	0.49	0.04
chr7	96992820	96993050	DLX6-AS1	hypermethylation	0.46	0.46	0
chr7	96993328	96993394	DLX6-AS1	hypermethylation	0.35	0.35	0
chr7	96997495	96997522	DLX6-AS1	hypermethylation	0.57	0.57	0
chr7	96997693	96997735	DLX6-AS1	hypermethylation	0.41	0.55	0.13
chr7	97002389	97002687	DLX6-AS1	hypermethylation	0.44	0.64	0.19
chr7	97003171	97003326	DLX6-AS1	hypermethylation	0.33	0.44	0.11
chr7	97021687	97021729	DLX6-AS1	hypermethylation	0.43	0.43	0
chr7	97021816	97021953	DLX6-AS1	hypermethylation	0.35	0.41	0.06
chr7	97022212	97022255	DLX6-AS1	hypermethylation	0.39	0.45	0.06
chr7	96945578	96946018	DLX6-AS1	hypomethylation	-0.35	0.51	0.86
chr7	96949448	96949938	DLX6-AS1	hypomethylation	-0.52	0.19	0.7
chr7	96961798	96962317	DLX6-AS1	hypomethylation	-0.39	0.36	0.75
chr7	96989109	96989348	DLX6-AS1	hypermethylation	0.32	0.32	0
chr7	96990067	96990309	DLX6-AS1	hypermethylation	0.37	0.43	0.06
chr7	96991806	96991852	DLX6-AS1	hypermethylation	0.34	0.38	0.04
chr7	96991946	96992033	DLX6-AS1	hypermethylation	0.44	0.53	0.09
chr7	96992518	96992608	DLX6-AS1	hypermethylation	0.45	0.49	0.04
chr7	96992820	96993050	DLX6-AS1	hypermethylation	0.46	0.46	0
chr7	96993328	96993394	DLX6-AS1	hypermethylation	0.35	0.35	0
chr7	96997495	96997522	DLX6-AS1	hypermethylation	0.57	0.57	0
chr7	96997693	96997735	DLX6-AS1	hypermethylation	0.41	0.55	0.13
chr7	97002389	97002687	DLX6-AS1	hypermethylation	0.44	0.64	0.19
chr7	97003171	97003326	DLX6-AS1	hypermethylation	0.33	0.44	0.11
chr7	97007447	97007490	DLX6-AS1	hypermethylation	0.49	0.56	0.08
chr7	97013480	97013550	DLX6-AS1	hypermethylation	0.35	0.5	0.16
chr7	97021687	97021729	DLX6-AS1	hypermethylation	0.43	0.43	0
chr7	97021816	97021953	DLX6-AS1	hypermethylation	0.35	0.41	0.06
chr7	97022212	97022255	DLX6-AS1	hypermethylation	0.39	0.45	0.06
chr7	96961798	96962317	DLX6-AS1	hypomethylation	-0.39	0.36	0.75
chr7	96989109	96989348	DLX6-AS1	hypermethylation	0.32	0.32	0
chr7	96990067	96990309	DLX6-AS1	hypermethylation	0.37	0.43	0.06
chr7	96991806	96991852	DLX6-AS1	hypermethylation	0.34	0.38	0.04
chr7	96991946	96992033	DLX6-AS1	hypermethylation	0.44	0.53	0.09
chr7	96992518	96992608	DLX6-AS1	hypermethylation	0.45	0.49	0.04
chr7	96992820	96993050	DLX6-AS1	hypermethylation	0.46	0.46	0
chr7	96993328	96993394	DLX6-AS1	hypermethylation	0.35	0.35	0
chr7	96997495	96997522	DLX6-AS1	hypermethylation	0.57	0.57	0
chr7	96997693	96997735	DLX6-AS1	hypermethylation	0.41	0.55	0.13
chr7	97002389	97002687	DLX6-AS1	hypermethylation	0.44	0.64	0.19
chr7	97003171	97003326	DLX6-AS1	hypermethylation	0.33	0.44	0.11
chr7	97007447	97007490	DLX6-AS1	hypermethylation	0.49	0.56	0.08
chr7	97013480	97013550	DLX6-AS1	hypermethylation	0.35	0.5	0.16
chr7	97013480	97013550	DLX6-AS1	hypermethylation	0.35	0.5	0.16
chr7	97021687	97021729	DLX6-AS1	hypermethylation	0.43	0.43	0
chr7	96989109	96989348	DLX6-AS1	hypermethylation	0.32	0.32	0
chr7	96990067	96990309	DLX6-AS1	hypermethylation	0.37	0.43	0.06
chr7	96991806	96991852	DLX6-AS1	hypermethylation	0.34	0.38	0.04
chr7	96991946	96992033	DLX6-AS1	hypermethylation	0.44	0.53	0.09
chr7	96992518	96992608	DLX6-AS1	hypermethylation	0.45	0.49	0.04
chr7	96992820	96993050	DLX6-AS1	hypermethylation	0.46	0.46	0
chr7	96993328	96993394	DLX6-AS1	hypermethylation	0.35	0.35	0
chr7	96997495	96997522	DLX6-AS1	hypermethylation	0.57	0.57	0
chr7	96997693	96997735	DLX6-AS1	hypermethylation	0.41	0.55	0.13
chr7	97002389	97002687	DLX6-AS1	hypermethylation	0.44	0.64	0.19
chr7	97003171	97003326	DLX6-AS1	hypermethylation	0.33	0.44	0.11
chr7	97007447	97007490	DLX6-AS1	hypermethylation	0.49	0.56	0.08
chr7	89883405	89883661	STEAP2-AS1	hypomethylation	-0.38	0.49	0.88
chr7	89910122	89910566	STEAP2-AS1	hypomethylation	-0.37	0.53	0.9
chr7	89913523	89914350	STEAP2-AS1	hypomethylation	-0.34	0.53	0.87
chr7	89925725	89925979	STEAP2-AS1	hypomethylation	-0.42	0.47	0.89
chr7	89951301	89952459	STEAP2-AS1	hypomethylation	-0.43	0.42	0.85
chr7	89955245	89955737	STEAP2-AS1	hypomethylation	-0.41	0.59	1
chr7	89965020	89965431	STEAP2-AS1	hypomethylation	-0.44	0.45	0.89
chr7	90006864	90007322	STEAP2-AS1	hypomethylation	-0.32	0.38	0.7
chr7	90021387	90022340	STEAP2-AS1	hypomethylation	-0.35	0.61	0.97
chr7	90057852	90058328	STEAP2-AS1	hypomethylation	-0.34	0.45	0.78
chr7	90058376	90059193	STEAP2-AS1	hypomethylation	-0.36	0.3	0.66
chr7	90077219	90077322	STEAP2-AS1	hypomethylation	-0.37	0.43	0.8
chr7	90082058	90082666	STEAP2-AS1	hypomethylation	-0.38	0.33	0.71
chr7	90086387	90086969	STEAP2-AS1	hypomethylation	-0.35	0.51	0.86
chr7	90107868	90109367	STEAP2-AS1	hypomethylation	-0.54	0.43	0.96
chr7	90161380	90161579	STEAP2-AS1	hypomethylation	-0.34	0.59	0.93
chr7	90178939	90179006	STEAP2-AS1	hypomethylation	-0.42	0.31	0.73
chr7	90189435	90189949	STEAP2-AS1	hypomethylation	-0.35	0.62	0.97
chr8	142212254	142212824	LINC00051	hypomethylation	-0.34	0.48	0.82
chr8	142216659	142216834	LINC00051	hypomethylation	-0.45	0.35	0.8
chr8	127786805	127787172	PVT1	hypomethylation	-0.57	0.37	0.95
chr8	127794982	127795253	PVT1	hypomethylation	-0.55	0.18	0.74
chr8	127795550	127795712	PVT1	hypomethylation	-0.41	0.34	0.75
chr8	127796009	127796092	PVT1	hypomethylation	-0.33	0.44	0.78
chr8	127799141	127799437	PVT1	hypomethylation	-0.48	0.33	0.81
chr8	127800148	127800614	PVT1	hypomethylation	-0.36	0.52	0.88
chr8	127800775	127800987	PVT1	hypomethylation	-0.37	0.3	0.66
chr8	127801058	127801157	PVT1	hypomethylation	-0.43	0.47	0.9
chr8	127801182	127801436	PVT1	hypomethylation	-0.6	0.35	0.95
chr8	127808036	127808234	PVT1	hypomethylation	-0.49	0.51	1
chr8	127823392	127823851	PVT1	hypomethylation	-0.5	0.33	0.83
chr8	127833391	127833443	PVT1	hypomethylation	-0.45	0.55	1
chr8	127840186	127840461	PVT1	hypermethylation	0.39	0.84	0.46
chr8	127846255	127846413	PVT1	hypomethylation	-0.37	0.49	0.86
chr8	127867854	127868114	PVT1	hypomethylation	-0.37	0.43	0.8
chr8	127870313	127870601	PVT1	hypomethylation	-0.51	0.23	0.74
chr8	127870863	127870974	PVT1	hypomethylation	-0.37	0.15	0.53
chr8	127876320	127876818	PVT1	hypomethylation	-0.34	0.27	0.61
chr8	127877167	127877413	PVT1	hypomethylation	-0.38	0.25	0.62
chr8	127877841	127878170	PVT1	hypomethylation	-0.53	0.36	0.89
chr8	127890394	127890467	PVT1	hypomethylation	-0.47	0.25	0.72
chr8	127911171	127911676	PVT1	hypomethylation	-0.41	0.37	0.79
chr8	127918149	127918199	PVT1	hypermethylation	0.39	0.81	0.42
chr8	127919222	127919423	PVT1	hypomethylation	-0.41	0.2	0.62
chr8	127930325	127930435	PVT1	hypomethylation	-0.35	0.57	0.92
chr8	127911171	127911676	PVT1	hypomethylation	-0.41	0.37	0.79
chr8	127918149	127918199	PVT1	hypermethylation	0.39	0.81	0.42
chr8	127919222	127919423	PVT1	hypomethylation	-0.41	0.2	0.62
chr8	127930325	127930435	PVT1	hypomethylation	-0.35	0.57	0.92
chr8	128108921	128109145	PVT1	hypomethylation	-0.37	0.42	0.79
chr8	127911171	127911676	PVT1	hypomethylation	-0.41	0.37	0.79
chr8	127918149	127918199	PVT1	hypermethylation	0.39	0.81	0.42
chr8	127919222	127919423	PVT1	hypomethylation	-0.41	0.2	0.62
chr8	127930325	127930435	PVT1	hypomethylation	-0.35	0.57	0.92
chr8	128018569	128018692	PVT1	hypermethylation	0.38	0.73	0.35
chr8	128028208	128028320	PVT1	hypomethylation	-0.51	0.32	0.83
chr8	128049392	128049695	PVT1	hypomethylation	-0.42	0.26	0.67
chr8	128088564	128088913	PVT1	hypomethylation	-0.38	0.53	0.9
chr8	127786805	127787172	PVT1	hypomethylation	-0.57	0.37	0.95
chr8	127794982	127795253	PVT1	hypomethylation	-0.55	0.18	0.74
chr8	127795550	127795712	PVT1	hypomethylation	-0.41	0.34	0.75
chr8	127796009	127796092	PVT1	hypomethylation	-0.33	0.44	0.78
chr8	127799141	127799437	PVT1	hypomethylation	-0.48	0.33	0.81
chr8	127800148	127800614	PVT1	hypomethylation	-0.36	0.52	0.88
chr8	127800775	127800987	PVT1	hypomethylation	-0.37	0.3	0.66
chr8	127801058	127801157	PVT1	hypomethylation	-0.43	0.47	0.9
chr8	127801182	127801436	PVT1	hypomethylation	-0.6	0.35	0.95
chr8	127808036	127808234	PVT1	hypomethylation	-0.49	0.51	1
chr8	127823392	127823851	PVT1	hypomethylation	-0.5	0.33	0.83
chr8	127833391	127833443	PVT1	hypomethylation	-0.45	0.55	1
chr8	127840186	127840461	PVT1	hypermethylation	0.39	0.84	0.46
chr8	127846255	127846413	PVT1	hypomethylation	-0.37	0.49	0.86
chr8	128018569	128018692	PVT1	hypermethylation	0.38	0.73	0.35
chr8	128028208	128028320	PVT1	hypomethylation	-0.51	0.32	0.83
chr8	128049392	128049695	PVT1	hypomethylation	-0.42	0.26	0.67
chr8	128088564	128088913	PVT1	hypomethylation	-0.38	0.53	0.9
chr8	127786805	127787172	PVT1	hypomethylation	-0.57	0.37	0.95
chr8	127794982	127795253	PVT1	hypomethylation	-0.55	0.18	0.74
chr8	127795550	127795712	PVT1	hypomethylation	-0.41	0.34	0.75
chr8	127795956	127796092	PVT1	hypomethylation	-0.34	0.44	0.78
chr8	127799141	127799437	PVT1	hypomethylation	-0.48	0.33	0.81
chr8	127800148	127800614	PVT1	hypomethylation	-0.36	0.52	0.88
chr8	127800775	127800987	PVT1	hypomethylation	-0.37	0.3	0.66
chr8	127801058	127801157	PVT1	hypomethylation	-0.43	0.47	0.9
chr8	127801182	127801436	PVT1	hypomethylation	-0.6	0.35	0.95
chr8	127808036	127808234	PVT1	hypomethylation	-0.49	0.51	1
chr8	127823392	127823851	PVT1	hypomethylation	-0.5	0.33	0.83
chr8	127833391	127833443	PVT1	hypomethylation	-0.45	0.55	1
chr8	127840186	127840461	PVT1	hypermethylation	0.39	0.84	0.46
chr8	127846255	127846413	PVT1	hypomethylation	-0.37	0.49	0.86
chr8	127867854	127868114	PVT1	hypomethylation	-0.37	0.43	0.8
chr8	127870313	127870601	PVT1	hypomethylation	-0.51	0.23	0.74
chr8	127870863	127870974	PVT1	hypomethylation	-0.37	0.15	0.53
chr8	127876320	127876818	PVT1	hypomethylation	-0.34	0.27	0.61
chr8	127877167	127877413	PVT1	hypomethylation	-0.38	0.25	0.62
chr8	127877841	127878170	PVT1	hypomethylation	-0.53	0.36	0.89
chr8	128018569	128018692	PVT1	hypermethylation	0.38	0.73	0.35
chr8	128028208	128028320	PVT1	hypomethylation	-0.51	0.32	0.83
chr8	128049392	128049695	PVT1	hypomethylation	-0.42	0.26	0.67
chr8	128088564	128088913	PVT1	hypomethylation	-0.38	0.53	0.9
chr8	127786805	127787172	PVT1	hypomethylation	-0.57	0.37	0.95
chr8	127794982	127795253	PVT1	hypomethylation	-0.55	0.18	0.74
chr8	127796009	127796092	PVT1	hypomethylation	-0.33	0.44	0.78
chr8	127799141	127799437	PVT1	hypomethylation	-0.48	0.33	0.81
chr8	127800148	127800614	PVT1	hypomethylation	-0.36	0.52	0.88
chr8	127800775	127800987	PVT1	hypomethylation	-0.37	0.3	0.66
chr8	127801058	127801157	PVT1	hypomethylation	-0.43	0.47	0.9
chr8	127801182	127801436	PVT1	hypomethylation	-0.6	0.35	0.95
chr8	127808036	127808234	PVT1	hypomethylation	-0.49	0.51	1
chr8	127823392	127823851	PVT1	hypomethylation	-0.5	0.33	0.83
chr8	127833391	127833443	PVT1	hypomethylation	-0.45	0.55	1
chr8	127840186	127840461	PVT1	hypermethylation	0.39	0.84	0.46
chr8	127846255	127846413	PVT1	hypomethylation	-0.37	0.49	0.86
chr8	127867854	127868114	PVT1	hypomethylation	-0.37	0.43	0.8
chr8	127870313	127870601	PVT1	hypomethylation	-0.51	0.23	0.74
chr8	127870863	127870974	PVT1	hypomethylation	-0.37	0.15	0.53
chr8	127876320	127876818	PVT1	hypomethylation	-0.34	0.27	0.61
chr8	127877167	127877413	PVT1	hypomethylation	-0.38	0.25	0.62
chr8	127877841	127878170	PVT1	hypomethylation	-0.53	0.36	0.89
chr8	127890394	127890467	PVT1	hypomethylation	-0.47	0.25	0.72
chr8	127911171	127911676	PVT1	hypomethylation	-0.41	0.37	0.79
chr8	127918149	127918199	PVT1	hypermethylation	0.39	0.81	0.42
chr8	127919222	127919423	PVT1	hypomethylation	-0.41	0.2	0.62
chr8	127930325	127930435	PVT1	hypomethylation	-0.35	0.57	0.92
chr8	127786805	127787172	PVT1	hypomethylation	-0.57	0.37	0.95
chr8	127794982	127795253	PVT1	hypomethylation	-0.55	0.18	0.74
chr8	127795550	127795812	PVT1	hypomethylation	-0.41	0.34	0.75
chr8	127796009	127796092	PVT1	hypomethylation	-0.33	0.44	0.78
chr8	127799141	127799437	PVT1	hypomethylation	-0.48	0.33	0.81
chr8	127800148	127800614	PVT1	hypomethylation	-0.36	0.52	0.88
chr8	127800775	127800987	PVT1	hypomethylation	-0.37	0.3	0.66
chr8	127801058	127801157	PVT1	hypomethylation	-0.43	0.47	0.9
chr8	127801182	127801436	PVT1	hypomethylation	-0.6	0.35	0.95
chr8	127808036	127808234	PVT1	hypomethylation	-0.49	0.51	1
chr8	127823392	127823851	PVT1	hypomethylation	-0.5	0.33	0.83
chr8	127833391	127833443	PVT1	hypomethylation	-0.45	0.55	1
chr8	127840186	127840461	PVT1	hypermethylation	0.39	0.84	0.46
chr8	127846255	127846413	PVT1	hypomethylation	-0.37	0.49	0.86
chr8	127867854	127868114	PVT1	hypomethylation	-0.37	0.43	0.8
chr8	127870313	127870601	PVT1	hypomethylation	-0.51	0.23	0.74
chr8	127870863	127870974	PVT1	hypomethylation	-0.37	0.15	0.53
chr8	127876320	127876818	PVT1	hypomethylation	-0.34	0.27	0.61
chr8	127877167	127877413	PVT1	hypomethylation	-0.38	0.25	0.62
chr8	127877841	127878170	PVT1	hypomethylation	-0.53	0.36	0.89
chr8	127786805	127787172	PVT1	hypomethylation	-0.57	0.37	0.95
chr8	127794982	127795253	PVT1	hypomethylation	-0.55	0.18	0.74
chr8	127795550	127795712	PVT1	hypomethylation	-0.41	0.34	0.75
chr8	127795956	127796092	PVT1	hypomethylation	-0.34	0.44	0.78
chr8	127799141	127799437	PVT1	hypomethylation	-0.48	0.33	0.81
chr8	127800148	127800614	PVT1	hypomethylation	-0.36	0.52	0.88
chr8	127800775	127800987	PVT1	hypomethylation	-0.37	0.3	0.66
chr8	127801058	127801157	PVT1	hypomethylation	-0.43	0.47	0.9
chr8	127801182	127801436	PVT1	hypomethylation	-0.6	0.35	0.95
chr8	127808036	127808234	PVT1	hypomethylation	-0.49	0.51	1
chr8	127823392	127823851	PVT1	hypomethylation	-0.5	0.33	0.83
chr8	127833391	127833443	PVT1	hypomethylation	-0.45	0.55	1
chr8	127840186	127840461	PVT1	hypermethylation	0.39	0.84	0.46
chr8	127846255	127846413	PVT1	hypomethylation	-0.37	0.49	0.86
chr8	127867854	127868114	PVT1	hypomethylation	-0.37	0.43	0.8
chr8	127870313	127870601	PVT1	hypomethylation	-0.51	0.23	0.74
chr8	127870863	127870974	PVT1	hypomethylation	-0.37	0.15	0.53
chr8	127876320	127876818	PVT1	hypomethylation	-0.34	0.27	0.61
chr8	127877167	127877413	PVT1	hypomethylation	-0.38	0.25	0.62
chr8	127877841	127878170	PVT1	hypomethylation	-0.53	0.36	0.89
chr8	128088564	128088913	PVT1	hypomethylation	-0.38	0.53	0.9
chr8	128108921	128109145	PVT1	hypomethylation	-0.37	0.42	0.79
chr8	128108921	128109145	PVT1	hypomethylation	-0.37	0.42	0.79
chr8	128018569	128018692	PVT1	hypermethylation	0.38	0.73	0.35
chr8	128028208	128028320	PVT1	hypomethylation	-0.51	0.32	0.83
chr8	128049392	128049695	PVT1	hypomethylation	-0.42	0.26	0.67
chr8	128088564	128088913	PVT1	hypomethylation	-0.38	0.53	0.9
chr8	127846255	127846413	PVT1	hypomethylation	-0.37	0.49	0.86
chr8	127867854	127868114	PVT1	hypomethylation	-0.37	0.43	0.8
chr8	127870313	127870601	PVT1	hypomethylation	-0.51	0.23	0.74
chr8	127870863	127870974	PVT1	hypomethylation	-0.37	0.15	0.53
chr8	127876320	127876818	PVT1	hypomethylation	-0.34	0.27	0.61
chr8	127877167	127877413	PVT1	hypomethylation	-0.38	0.25	0.62
chr8	127877841	127878170	PVT1	hypomethylation	-0.53	0.36	0.89
chr8	127786805	127787172	PVT1	hypomethylation	-0.57	0.37	0.95
chr8	127794982	127795253	PVT1	hypomethylation	-0.55	0.18	0.74
chr8	127795550	127795712	PVT1	hypomethylation	-0.41	0.34	0.75
chr8	127795956	127796092	PVT1	hypomethylation	-0.34	0.44	0.78
chr8	127799141	127799437	PVT1	hypomethylation	-0.48	0.33	0.81
chr8	127800148	127800614	PVT1	hypomethylation	-0.36	0.52	0.88
chr8	127800775	127800987	PVT1	hypomethylation	-0.37	0.3	0.66
chr8	127801058	127801157	PVT1	hypomethylation	-0.43	0.47	0.9
chr8	127801182	127801436	PVT1	hypomethylation	-0.6	0.35	0.95
chr8	127808036	127808234	PVT1	hypomethylation	-0.49	0.51	1
chr8	127823392	127823851	PVT1	hypomethylation	-0.5	0.33	0.83
chr8	127833391	127833443	PVT1	hypomethylation	-0.45	0.55	1
chr8	127840186	127840461	PVT1	hypermethylation	0.39	0.84	0.46
chr8	127846255	127846413	PVT1	hypomethylation	-0.37	0.49	0.86
chr8	127786805	127787172	PVT1	hypomethylation	-0.57	0.37	0.95
chr8	127794982	127795253	PVT1	hypomethylation	-0.55	0.18	0.74
chr8	127795550	127795712	PVT1	hypomethylation	-0.41	0.34	0.75
chr8	127799141	127799437	PVT1	hypomethylation	-0.48	0.33	0.81
chr8	127800148	127800614	PVT1	hypomethylation	-0.36	0.52	0.88
chr8	127800775	127800987	PVT1	hypomethylation	-0.37	0.3	0.66
chr8	127801058	127801157	PVT1	hypomethylation	-0.43	0.47	0.9
chr8	127801182	127801436	PVT1	hypomethylation	-0.6	0.35	0.95
chr8	127808036	127808234	PVT1	hypomethylation	-0.49	0.51	1
chr8	127823392	127823851	PVT1	hypomethylation	-0.5	0.33	0.83
chr8	127833391	127833443	PVT1	hypomethylation	-0.45	0.55	1
chr8	127840186	127840461	PVT1	hypermethylation	0.39	0.84	0.46
chr8	127846255	127846413	PVT1	hypomethylation	-0.37	0.49	0.86
chr8	127867854	127868114	PVT1	hypomethylation	-0.37	0.43	0.8
chr8	127870313	127870601	PVT1	hypomethylation	-0.51	0.23	0.74
chr8	127870863	127870974	PVT1	hypomethylation	-0.37	0.15	0.53
chr8	127876320	127876818	PVT1	hypomethylation	-0.34	0.27	0.61
chr8	127877167	127877413	PVT1	hypomethylation	-0.38	0.25	0.62
chr8	127877841	127878170	PVT1	hypomethylation	-0.53	0.36	0.89
chr8	127786805	127787172	PVT1	hypomethylation	-0.57	0.37	0.95
chr8	127794982	127795253	PVT1	hypomethylation	-0.55	0.18	0.74
chr8	127795550	127795712	PVT1	hypomethylation	-0.41	0.34	0.75
chr8	127795956	127796092	PVT1	hypomethylation	-0.34	0.44	0.78
chr8	127799141	127799437	PVT1	hypomethylation	-0.48	0.33	0.81
chr8	127800148	127800614	PVT1	hypomethylation	-0.36	0.52	0.88
chr8	127800775	127800987	PVT1	hypomethylation	-0.37	0.3	0.66
chr8	127801058	127801157	PVT1	hypomethylation	-0.43	0.47	0.9
chr8	127801182	127801436	PVT1	hypomethylation	-0.6	0.35	0.95
chr8	127808036	127808234	PVT1	hypomethylation	-0.49	0.51	1
chr8	127823392	127823851	PVT1	hypomethylation	-0.5	0.33	0.83
chr8	127833391	127833443	PVT1	hypomethylation	-0.45	0.55	1
chr8	127840186	127840461	PVT1	hypermethylation	0.39	0.84	0.46
chr8	127846255	127846413	PVT1	hypomethylation	-0.37	0.49	0.86
chr8	127867854	127868114	PVT1	hypomethylation	-0.37	0.43	0.8
chr8	127870313	127870601	PVT1	hypomethylation	-0.51	0.23	0.74
chr8	127870863	127870974	PVT1	hypomethylation	-0.37	0.15	0.53
chr8	127876320	127876818	PVT1	hypomethylation	-0.34	0.27	0.61
chr8	127877167	127877413	PVT1	hypomethylation	-0.38	0.25	0.62
chr8	127877841	127878170	PVT1	hypomethylation	-0.53	0.36	0.89
chr8	127911171	127911676	PVT1	hypomethylation	-0.41	0.37	0.79
chr8	127918149	127918199	PVT1	hypermethylation	0.39	0.81	0.42
chr8	127919222	127919423	PVT1	hypomethylation	-0.41	0.2	0.62
chr8	127930325	127930435	PVT1	hypomethylation	-0.35	0.57	0.92
chr8	128018569	128018692	PVT1	hypermethylation	0.38	0.73	0.35
chr8	128028208	128028320	PVT1	hypomethylation	-0.51	0.32	0.83
chr8	128049392	128049695	PVT1	hypomethylation	-0.42	0.26	0.67
chr8	127890394	127890676	PVT1	hypomethylation	-0.47	0.25	0.72
chr8	127911171	127911676	PVT1	hypomethylation	-0.41	0.37	0.79
chr8	127918149	127918199	PVT1	hypermethylation	0.39	0.81	0.42
chr8	127919222	127919423	PVT1	hypomethylation	-0.41	0.2	0.62
chr8	127930325	127930435	PVT1	hypomethylation	-0.35	0.57	0.92
chr8	127786805	127787172	PVT1	hypomethylation	-0.57	0.37	0.95
chr8	127794982	127795253	PVT1	hypomethylation	-0.55	0.18	0.74
chr8	127795550	127795712	PVT1	hypomethylation	-0.41	0.34	0.75
chr8	127795956	127796071	PVT1	hypomethylation	-0.34	0.44	0.78
chr8	127799141	127799437	PVT1	hypomethylation	-0.48	0.33	0.81
chr8	127800148	127800614	PVT1	hypomethylation	-0.36	0.52	0.88
chr8	127800775	127800987	PVT1	hypomethylation	-0.37	0.3	0.66
chr8	127801058	127801157	PVT1	hypomethylation	-0.43	0.47	0.9
chr8	127801182	127801436	PVT1	hypomethylation	-0.6	0.35	0.95
chr8	127808036	127808234	PVT1	hypomethylation	-0.49	0.51	1
chr8	127823392	127823851	PVT1	hypomethylation	-0.5	0.33	0.83
chr8	127833391	127833443	PVT1	hypomethylation	-0.45	0.55	1
chr8	127840186	127840461	PVT1	hypermethylation	0.39	0.84	0.46
chr8	127846255	127846413	PVT1	hypomethylation	-0.37	0.49	0.86
chr8	127867854	127868114	PVT1	hypomethylation	-0.37	0.43	0.8
chr8	127870313	127870601	PVT1	hypomethylation	-0.51	0.23	0.74
chr8	127870863	127870974	PVT1	hypomethylation	-0.37	0.15	0.53
chr8	127876320	127876818	PVT1	hypomethylation	-0.34	0.27	0.61
chr8	127877167	127877413	PVT1	hypomethylation	-0.38	0.25	0.62
chr8	127877841	127878170	PVT1	hypomethylation	-0.53	0.36	0.89
chr9	21490351	21493915	MIR31HG	hypomethylation	-0.38	0.52	0.9
chrX	103634809	103635821	TCEAL3-AS1	hypomethylation	-0.44	0.56	1
